# Supplementary material for: Contexts for developing of national essential diagnostics list. Lessons from a mixed-methods study of existing documents, stakeholders and decision making on tier-specific essential in-vitro diagnostics in African countries
Source: PubMed Central journal article supplement (PMC10194858; doi:10.1371/journal.pgph.0001893), 2023-05-18
Supplement: pgph.0001893.s001.pdf [file pgph.0001893.s001.pdf]

S1 Table. Test Menus

| Country       | Name of test menu, with dates                                                         | URL (if available)                                                                                                                                                                                                                                                                                                                                                    |
|---------------|---------------------------------------------------------------------------------------|-----------------------------------------------------------------------------------------------------------------------------------------------------------------------------------------------------------------------------------------------------------------------------------------------------------------------------------------------------------------------|
| Nigeria       | Nigeria National Essential Diagnostics List 2021                                      | Not found online – <a href="#">Document shared</a>                                                                                                                                                                                                                                                                                                                    |
| Benin         | Paquet minimum d'activités Normes corrigé et Mis en forme (2009)                      | Not found online – <a href="#">Document shared</a>                                                                                                                                                                                                                                                                                                                    |
| Botswana      | Standardisation and Laboratory Logistics System Design for Botswana 2009              | <a href="https://studylib.net/doc/18226387/standardization-and-laboratory-logistics-system-design-fo...">https://studylib.net/doc/18226387/standardization-and-laboratory-logistics-system-design-fo...</a>                                                                                                                                                           |
| Burkina Faso  | Normes en Matière de Laboratoires d'Analyses de Biologie Médicale Juillet 2009        | Not found online – <a href="#">Document shared</a>                                                                                                                                                                                                                                                                                                                    |
| Burundi       | Les normes et standards des laboratoires de Biologie médicale au Burundi              | <a href="https://afahobckpstorageaccount.blob.core.windows.net/afahobckpcontainer/production/files/Les_normes_et_standards_des_laboratoires_de_Biologie_m%C3%A9dicale_au_Burundi.pdf">https://afahobckpstorageaccount.blob.core.windows.net/afahobckpcontainer/production/files/Les_normes_et_standards_des_laboratoires_de_Biologie_m%C3%A9dicale_au_Burundi.pdf</a> |
| Cameroon      | Organisation des Laboratoires Suivant la Pyramide Sanitaire au Cameroun 2011          | Not found online – <a href="#">Document shared</a>                                                                                                                                                                                                                                                                                                                    |
| Côte d'Ivoire | Organisation Laboratoires Analyses Biologie Médicale (2008)                           | Not found online – <a href="#">Document shared</a>                                                                                                                                                                                                                                                                                                                    |
| eSwatini      | Essential health care package for Swaziland (2010)                                    | <a href="https://extranet.who.int/countryplanningcycles/sites/default/files/planning_cycle_repository/swaziland/essential_health_care_package_for_swaziland.pdf">https://extranet.who.int/countryplanningcycles/sites/default/files/planning_cycle_repository/swaziland/essential_health_care_package_for_swaziland.pdf</a>                                           |
| Ethiopia      | The Master Plan for the Public Health Laboratory System 2009-2013                     | <a href="https://www.eph.gov.et/images/downloads/Ethiopia%20Lab%20Master%20Plan_2nd%20Edition.pdf">https://www.eph.gov.et/images/downloads/Ethiopia%20Lab%20Master%20Plan_2nd%20Edition.pdf</a>                                                                                                                                                                       |
| Gabon         | Health Sector Standards 2011                                                          | <a href="https://csgabon.info/file/f2/Normessante%2014072011.pdf">https://csgabon.info/file/f2/Normessante%2014072011.pdf</a>                                                                                                                                                                                                                                         |
| Gambia        | Basic package test menu - Disease Specific Reference Laboratories (not dated)         | Not found online – <a href="#">Document shared</a>                                                                                                                                                                                                                                                                                                                    |
| Ghana         | Development of a Tiered Laboratory System in Ghana (2021)<br>Laboratory Policy (2015) | Not found online – <a href="#">Document shared</a>                                                                                                                                                                                                                                                                                                                    |
| Guinea        | Politique Nationale de Biologie Médicale (2009)                                       | <a href="https://portail.sante.gov.gn/wp-content/uploads/2020/04/29.-Politique-Nationale-de-Biologie-M%C3%A9dicale-ocr.pdf">https://portail.sante.gov.gn/wp-content/uploads/2020/04/29.-Politique-Nationale-de-Biologie-M%C3%A9dicale-ocr.pdf</a>                                                                                                                     |
| Guinee Bissau | Lista de testes por nível (not dated)                                                 | Not found online – <a href="#">Document shared</a>                                                                                                                                                                                                                                                                                                                    |
| Kenya         | Kenya Essential Medical Laboratory Commodity List 2014                                | <a href="https://docplayer.net/43635108-Kenya-essential-medical-laboratory-commodity-list-2014.html">https://docplayer.net/43635108-Kenya-essential-medical-laboratory-commodity-list-2014.html</a>                                                                                                                                                                   |
| Liberia       | Essential Package of Health Services (2011)                                           | Not found online – <a href="#">Document shared</a>                                                                                                                                                                                                                                                                                                                    |

|              |                                                                                                                          |                                                                                                                                                                                                                                               |
|--------------|--------------------------------------------------------------------------------------------------------------------------|-----------------------------------------------------------------------------------------------------------------------------------------------------------------------------------------------------------------------------------------------|
| Malawi       | Standardisation of Laboratory Tests, Techniques and Equipment 2009                                                       | <a href="https://pdf.usaid.gov/pdf_docs/Pnadr853.pdf">https://pdf.usaid.gov/pdf_docs/Pnadr853.pdf</a>                                                                                                                                         |
| Mali         | "Guide de Bonne Exécution des Analyses (GBEA) dans les laboratoires d'Analyses Médicales (2005)"                         | Not found online – <a href="#">Document shared</a>                                                                                                                                                                                            |
| Niger        | Paquet Minimum d'Activités des laboratoires par niveau de la pyramide sanitaire (not dated)                              | Not found online – <a href="#">Document shared</a>                                                                                                                                                                                            |
| Senegal      | Manuel des Techniques Laboratoire 2015                                                                                   | <a href="https://dirlabosn.com/wp-content/uploads/2020/02/manuel_SGQ.pdf">https://dirlabosn.com/wp-content/uploads/2020/02/manuel_SGQ.pdf</a>                                                                                                 |
| Sierra Leone | Basic Package of Essential Health Services (2015-2020)                                                                   | <a href="https://mohs2017.files.wordpress.com/2017/06/gosl_2015_basic-package-of-essential-health-services-2015-2020.pdf">https://mohs2017.files.wordpress.com/2017/06/gosl_2015_basic-package-of-essential-health-services-2015-2020.pdf</a> |
| South Africa | Primary Health Care - Laboratory Handbook May 2018                                                                       | <a href="https://knowledgehub.health.gov.za/elibrary/primary-health-care-phc-laboratory-handbook">https://knowledgehub.health.gov.za/elibrary/primary-health-care-phc-laboratory-handbook</a>                                                 |
| Togo         | "* Documents split by different laboratory sections (Anatomy, toxicology, Biology, Parasitology, Immunology etc) (2021)" | Not found online – <a href="#">Document shared</a>                                                                                                                                                                                            |
| Uganda       | Standard Test Menu, Techniques and List of Supplies for Health Laboratories in Uganda 2017-2020                          | <a href="https://www.cphl.go.ug/sites/default/files/2019-06/NSTMT%20TEST%20MENU.pdf">https://www.cphl.go.ug/sites/default/files/2019-06/NSTMT%20TEST%20MENU.pdf</a>                                                                           |
| Tanzania     | Standard Medical Laboratory Equipment Guideline 2018                                                                     | Not found online – <a href="#">Document shared</a>                                                                                                                                                                                            |
| Zimbabwe     | Laboratory Harmonisation and Standardisation in Zimbabwe 2015                                                            | Not found online – <a href="#">Document shared</a>                                                                                                                                                                                            |
