# Supplementary material for: Contexts for developing of national essential diagnostics list. Lessons from a mixed-methods study of existing documents, stakeholders and decision making on tier-specific essential in-vitro diagnostics in African countries
Source: PubMed Central journal article supplement (PMC10194858; doi:10.1371/journal.pgph.0001893), 2023-05-18
Supplement: pgph.0001893.s002.pdf [file pgph.0001893.s002.pdf]

| Country                                                                                                                          | Document Name                                                                                              | Year                                                                                                                                                                                                                                                                                            | URL                                                                                                                                                                                                                                                                                                                                                                                                               |
|----------------------------------------------------------------------------------------------------------------------------------|------------------------------------------------------------------------------------------------------------|-------------------------------------------------------------------------------------------------------------------------------------------------------------------------------------------------------------------------------------------------------------------------------------------------|-------------------------------------------------------------------------------------------------------------------------------------------------------------------------------------------------------------------------------------------------------------------------------------------------------------------------------------------------------------------------------------------------------------------|
| Angola                                                                                                                           | liep_aids_national_program_angola                                                                          | 1999-2002                                                                                                                                                                                                                                                                                       | Document shared                                                                                                                                                                                                                                                                                                                                                                                                   |
|                                                                                                                                  | angola_hiv_aids_en                                                                                         | 2003-2008                                                                                                                                                                                                                                                                                       | <a href="https://gwa.unaids.org/external-resource/angola-aids-national-strategic-plan-2003-2008">https://gwa.unaids.org/external-resource/angola-aids-national-strategic-plan-2003-2008</a>                                                                                                                                                                                                                       |
|                                                                                                                                  | PLANO ESTRATÉGICO NACIONAL PARA AS INFECÇÕES DE TRANSMISSÃO SEXUAL, VIH / SIDA                             | 2003-2008                                                                                                                                                                                                                                                                                       | <a href="https://www.ilo.org/wcmsp5/groups/public/---ed_protect/---protrav/---ilo_aids/documents/legaldocument/wcms_173701.pdf">https://www.ilo.org/wcmsp5/groups/public/---ed_protect/---protrav/---ilo_aids/documents/legaldocument/wcms_173701.pdf</a>                                                                                                                                                         |
|                                                                                                                                  | Plano Estratégico Nacional Para o Controlo das Infecções de Transmissão Sexual, VIH e SIDA_2007-2010_fr    | 2007-2010                                                                                                                                                                                                                                                                                       | <a href="https://www.ilo.org/wcmsp5/groups/public/---ed_protect/---protrav/---ilo_aids/documents/legaldocument/wcms_126907.pdf">https://www.ilo.org/wcmsp5/groups/public/---ed_protect/---protrav/---ilo_aids/documents/legaldocument/wcms_126907.pdf</a>                                                                                                                                                         |
|                                                                                                                                  | fy-2019-angola-malaria-operational-plan                                                                    | 2019                                                                                                                                                                                                                                                                                            | <a href="https://d1u4kg159ptc4z.cloudfront.net/uploads/2021/03/fy-2019-angola-malaria-operational-plan.pdf">https://d1u4kg159ptc4z.cloudfront.net/uploads/2021/03/fy-2019-angola-malaria-operational-plan.pdf</a>                                                                                                                                                                                                 |
|                                                                                                                                  | 02-Angola-Plano-de-Transição-da-Pólio-v-20-Abr-18                                                          | 2018-2022                                                                                                                                                                                                                                                                                       | <a href="https://www.passeidireto.com/arquivo/76400133/02-angola-plano-de-transicao-da-polio-v-20-abr-18">https://www.passeidireto.com/arquivo/76400133/02-angola-plano-de-transicao-da-polio-v-20-abr-18</a>                                                                                                                                                                                                     |
| Benin                                                                                                                            | PLANO NACIONAL DE DESENVOLVIMENTO SANITARIO                                                                | 2012-2025                                                                                                                                                                                                                                                                                       | <a href="https://extranet.who.int/mindbank/item/3460">https://extranet.who.int/mindbank/item/3460</a>                                                                                                                                                                                                                                                                                                             |
|                                                                                                                                  | Benin Strategic plan 2016 - 2020                                                                           | 2016-2020                                                                                                                                                                                                                                                                                       | Document shared                                                                                                                                                                                                                                                                                                                                                                                                   |
|                                                                                                                                  | Benin-Plan-National-de-Développement-Sanitaire-2018-2022                                                   | 2018-2022                                                                                                                                                                                                                                                                                       | <a href="https://www.prb.org/wp-content/uploads/2020/06/Benin-Plan-National-de-D3%A9veloppement-Sanitaire-2018-2022.pdf">https://www.prb.org/wp-content/uploads/2020/06/Benin-Plan-National-de-D3%A9veloppement-Sanitaire-2018-2022.pdf</a>                                                                                                                                                                       |
|                                                                                                                                  | Benin_PSN_TB_2015-2019                                                                                     | 2015-2019                                                                                                                                                                                                                                                                                       | Document shared                                                                                                                                                                                                                                                                                                                                                                                                   |
|                                                                                                                                  | Benin-AIDS-National-Strategic-Plan-2008                                                                    | 2008                                                                                                                                                                                                                                                                                            | <a href="https://gwa.unaids.org/external-resource/benin-aids-national-strategic-plan-2008">https://gwa.unaids.org/external-resource/benin-aids-national-strategic-plan-2008</a>                                                                                                                                                                                                                                   |
|                                                                                                                                  | Benin-Plan-Operational-de-Reduction-de-la-Mortalite-Maternelle-et-Neonatale-au-Benin                       | 2018 - 2022                                                                                                                                                                                                                                                                                     | <a href="https://www.prb.org/wp-content/uploads/2020/06/Benin-Plan-Operational-de-Reduction-de-la-Mortalite-Maternelle-et-Neonatale-au-Benin.pdf">https://www.prb.org/wp-content/uploads/2020/06/Benin-Plan-Operational-de-Reduction-de-la-Mortalite-Maternelle-et-Neonatale-au-Benin.pdf</a>                                                                                                                     |
|                                                                                                                                  | Benin Plan_strategique_integre_lutte_contre_maladies_non_transmissibles_2014-2018                          | 2014-2018                                                                                                                                                                                                                                                                                       | <a href="https://www.iccp-portal.org/system/files/plans/Benin%20Plan_strategique_integre_lutte_contre_maladies_non_transmissibles_2014-2018.pdf">https://www.iccp-portal.org/system/files/plans/Benin%20Plan_strategique_integre_lutte_contre_maladies_non_transmissibles_2014-2018.pdf</a>                                                                                                                       |
|                                                                                                                                  | PLAN STRATEGIQUE INTEGRE DE LUTTE CONTRE LES MALADIES NON TRANSMISSIBLES 2019-2023                         | 2019-2023                                                                                                                                                                                                                                                                                       | <a href="https://www.iccp-portal.org/system/files/plans/MU_B3_s21_Plan%20Strat%3%A9gique%20MNT%20VF%20230319.pdf">https://www.iccp-portal.org/system/files/plans/MU_B3_s21_Plan%20Strat%3%A9gique%20MNT%20VF%20230319.pdf</a>                                                                                                                                                                                     |
|                                                                                                                                  | PLAN D'ACTION NATIONAL DE LA SECURITE SANITAIRE DU BENIN                                                   | 2019-2021                                                                                                                                                                                                                                                                                       | <a href="https://faolex.fao.org/docs/pdf/ben196357.pdf">https://faolex.fao.org/docs/pdf/ben196357.pdf</a>                                                                                                                                                                                                                                                                                                         |
|                                                                                                                                  | Document-de-Strategie-Nationale-de-Reduction-de-la-Mortalite-Maternelle-et-Neonatale-au-Benin-2006-2015    | 2006-2015                                                                                                                                                                                                                                                                                       | <a href="https://fr.readkong.com/page/document-de-strategie-nationale-de-reduction-de-la-1702259">https://fr.readkong.com/page/document-de-strategie-nationale-de-reduction-de-la-1702259</a>                                                                                                                                                                                                                     |
|                                                                                                                                  | STRATEGIE NATIONALE MULTISECTORIELLE DE SANTE SEXUELLE ET DE LA REPRODUCTION DES ADOLESCENTS ET JEUNES     | 2010-2020                                                                                                                                                                                                                                                                                       | <a href="https://www.prb.org/wp-content/uploads/2018/05/Strate%CC%81gie-Nationale-Multisectorielle-de-Sante%CC%81-sexuelle-et-de-la-Reproduction-des-Adolescents-et-Jeunes-au-Ber%CC%81nin-2010-2020.pdf">https://www.prb.org/wp-content/uploads/2018/05/Strate%CC%81gie-Nationale-Multisectorielle-de-Sante%CC%81-sexuelle-et-de-la-Reproduction-des-Adolescents-et-Jeunes-au-Ber%CC%81nin-2010-2020.pdf</a>     |
|                                                                                                                                  | ANNEXE 4 - PIC Plan Intégré de com SMNE-version finale                                                     | 2014-2018                                                                                                                                                                                                                                                                                       | Document shared                                                                                                                                                                                                                                                                                                                                                                                                   |
| PSNIE BENIN_2020-2024 (PLAN STRATEGIQUE NATIONAL INTEGRE ORIENTE VERS L'ELIMINATION DU VIH/SIDA, LA TUBERCULOSE ET LE PALUDISME) | 2020-2024                                                                                                  | Document shared                                                                                                                                                                                                                                                                                 |                                                                                                                                                                                                                                                                                                                                                                                                                   |
| fy-2016-benin-malaria-operational-plan                                                                                           | 2016                                                                                                       | <a href="https://d1u4kg159ptc4z.cloudfront.net/uploads/2021/03/fy-2016-benin-malaria-operational-plan.pdf">https://d1u4kg159ptc4z.cloudfront.net/uploads/2021/03/fy-2016-benin-malaria-operational-plan.pdf</a>                                                                                 |                                                                                                                                                                                                                                                                                                                                                                                                                   |
| Botswana                                                                                                                         | revised_National_Health_Policy                                                                             | 2011                                                                                                                                                                                                                                                                                            | Document shared                                                                                                                                                                                                                                                                                                                                                                                                   |
|                                                                                                                                  | Standardization and Laboratory Logistics System Design for Botswana                                        | 2009                                                                                                                                                                                                                                                                                            | <a href="https://studylib.net/doc/18226387/standardization-and-laboratory-logistics-system-design-for-botswana">https://studylib.net/doc/18226387/standardization-and-laboratory-logistics-system-design-for-botswana</a>                                                                                                                                                                                         |
|                                                                                                                                  | Botswana Integrated Health Service Plan Final HISP                                                         | 2010-2020                                                                                                                                                                                                                                                                                       | <a href="https://www.medbox.org/document/integrated-health-service-plan-a-strategy-for-changing-the-health-sector-for-healthy-botswana-2010-2020#GO">https://www.medbox.org/document/integrated-health-service-plan-a-strategy-for-changing-the-health-sector-for-healthy-botswana-2010-2020#GO</a>                                                                                                               |
|                                                                                                                                  | Malaria Strategic Plan Botswana 2010-2015                                                                  | 2010-2015                                                                                                                                                                                                                                                                                       | <a href="https://endmalaria.org/sites/default/files/botswana2010-2015.pdf">https://endmalaria.org/sites/default/files/botswana2010-2015.pdf</a>                                                                                                                                                                                                                                                                   |
|                                                                                                                                  | Botswana National Drug (Medicine) Policy                                                                   | 2005                                                                                                                                                                                                                                                                                            | <a href="https://www.moh.gov.bw/Publications/policies/Botswana%20National%20Drug%20(Medicine)%20Policy.pdf">https://www.moh.gov.bw/Publications/policies/Botswana%20National%20Drug%20(Medicine)%20Policy.pdf</a>                                                                                                                                                                                                 |
|                                                                                                                                  | NATIONAL TUBERCULOSIS PROGRAM MANUAL botswana_tb                                                           | 2007                                                                                                                                                                                                                                                                                            | <a href="https://www.medbox.org/document/botswana-national-tuberculosis-programme-manual#GO">https://www.medbox.org/document/botswana-national-tuberculosis-programme-manual#GO</a>                                                                                                                                                                                                                               |
|                                                                                                                                  | botswana_tb_hiv_policy_guidelines_(2011)                                                                   | 2011                                                                                                                                                                                                                                                                                            | <a href="https://www.tbonline.info/media/uploads/documents/botswana_tb_hiv_policy_guidelines_%282011%29.pdf">https://www.tbonline.info/media/uploads/documents/botswana_tb_hiv_policy_guidelines_%282011%29.pdf</a>                                                                                                                                                                                               |
|                                                                                                                                  | Botswana Essential Health Service Plan HISP                                                                | 2010                                                                                                                                                                                                                                                                                            | <a href="https://www.moh.gov.bw/Publications/policies/Botswana%20EHSP%20HISP.pdf">https://www.moh.gov.bw/Publications/policies/Botswana%20EHSP%20HISP.pdf</a>                                                                                                                                                                                                                                                     |
|                                                                                                                                  | Botswana Maternal Mortality Reduction Initiative                                                           | 2015                                                                                                                                                                                                                                                                                            | <a href="https://pdf.usaid.gov/pdf_docs/PADDTCKG.pdf">https://pdf.usaid.gov/pdf_docs/PADDTCKG.pdf</a>                                                                                                                                                                                                                                                                                                             |
|                                                                                                                                  | Botswana NCD Strategy Final                                                                                | 2018-2013                                                                                                                                                                                                                                                                                       | <a href="https://www.iccp-portal.org/system/files/plans/Botswana%20NCD%20Strategy%20Final.pdf">https://www.iccp-portal.org/system/files/plans/Botswana%20NCD%20Strategy%20Final.pdf</a>                                                                                                                                                                                                                           |
|                                                                                                                                  | Clinic standards                                                                                           | 2013                                                                                                                                                                                                                                                                                            | <a href="https://www.moh.gov.bw/Publications/standards/Botswana%20National%20Health%20Quality%20Standards%20for%20Clinics/Botswana%20CLINIC%20Standards%20SE%2020Primary%20Healthcare%20Services.pdf">https://www.moh.gov.bw/Publications/standards/Botswana%20National%20Health%20Quality%20Standards%20for%20Clinics/Botswana%20CLINIC%20Standards%20SE%2020Primary%20Healthcare%20Services.pdf</a>             |
|                                                                                                                                  | The National HIV/AIDS Strategic Framework 2003-2009                                                        | 2003-2009                                                                                                                                                                                                                                                                                       | <a href="https://extranet.who.int/countryplanningcycles/sites/default/files/country_docs/Botswana/botswana_national_hiv_aids_strategic_framework_2003-2009.pdf">https://extranet.who.int/countryplanningcycles/sites/default/files/country_docs/Botswana/botswana_national_hiv_aids_strategic_framework_2003-2009.pdf</a>                                                                                         |
| Burkina Faso                                                                                                                     | Burkina_Faso_Nat_Health_Strategy_2011-2020_fr                                                              | 2011-2020                                                                                                                                                                                                                                                                                       | <a href="https://www.childrendaids.org/sites/default/files/2018-05/Burkina_Faso_Nat_Health_Strategy_2011-2020%20fr.pdf">https://www.childrendaids.org/sites/default/files/2018-05/Burkina_Faso_Nat_Health_Strategy_2011-2020%20fr.pdf</a>                                                                                                                                                                         |
|                                                                                                                                  | PLAN STRATEGIQUE NATIONAL MULTISECTORIEL DE LUTTE CONTRE LES MALADIES NON TRANSMISSIBLES                   | 2019-2021                                                                                                                                                                                                                                                                                       | Document shared                                                                                                                                                                                                                                                                                                                                                                                                   |
|                                                                                                                                  | Burkina Faso - Plan Stratégique Intégré de lutte contre les maladies non transmissibles 2014-2018          | 2014-2018                                                                                                                                                                                                                                                                                       | <a href="https://www.iccp-portal.org/sites/default/files/plans/Burkina%20Faso%20-%20Plan%20Strat%3%A9gique%20Int%3%A0gr%3%A9%20de%20lutte%20contre%20les%20maladies%20non%20transmissibles%202014-2018.pdf">https://www.iccp-portal.org/sites/default/files/plans/Burkina%20Faso%20-%20Plan%20Strat%3%A9gique%20Int%3%A0gr%3%A9%20de%20lutte%20contre%20les%20maladies%20non%20transmissibles%202014-2018.pdf</a> |
|                                                                                                                                  | Sante-Diabete_strategie_COVID19-Diabete_FR                                                                 | 2020                                                                                                                                                                                                                                                                                            | <a href="https://www.ifd.org/communitarian/communitarian/fr/fr/sante-diabete-strategie-strategie_COVID19-Diabete_FR">https://www.ifd.org/communitarian/communitarian/fr/fr/sante-diabete-strategie-strategie_COVID19-Diabete_FR</a>                                                                                                                                                                               |
|                                                                                                                                  | guide de bonne execution des analyses de biologie medicale au burkina faso                                 | 2009                                                                                                                                                                                                                                                                                            | <a href="https://www.studocu.com/row/document/universite-de-ouagadougou/hematologie/gbea-bf-2-guide-de-execution-des-examens-de-biologie-medicale/21664603">https://www.studocu.com/row/document/universite-de-ouagadougou/hematologie/gbea-bf-2-guide-de-execution-des-examens-de-biologie-medicale/21664603</a>                                                                                                 |
|                                                                                                                                  | cadre strategique de lutte contre le vih/sida 2001-2005                                                    | 2001-2005                                                                                                                                                                                                                                                                                       | <a href="https://data.unaids.org/topics/nsp-library/nsp-africa/nsp_burkina_faso_2001-2005_fr.pdf">https://data.unaids.org/topics/nsp-library/nsp-africa/nsp_burkina_faso_2001-2005_fr.pdf</a>                                                                                                                                                                                                                     |
|                                                                                                                                  | PLAN STRATEGIQUE INTEGRE DE LUTTE CONTRE LES MALADIES NON TRANSMISSIBLES 2016-2020                         | 2016-2020                                                                                                                                                                                                                                                                                       | <a href="https://www.medbox.org/document/plan-strategique-integre-de-lutte-contre-les-maladies-non-transmissibles-burkina-faso#GO">https://www.medbox.org/document/plan-strategique-integre-de-lutte-contre-les-maladies-non-transmissibles-burkina-faso#GO</a>                                                                                                                                                   |
|                                                                                                                                  | Cadre Strategique de Lutte Contre Le VIH/SIDA 2006-2010                                                    | 2006-2010                                                                                                                                                                                                                                                                                       | <a href="https://www.ilo.org/dyn/natlex/docs/MONOGRAPH/111680/139299/fr-1243072672/BFA-111680.pdf">https://www.ilo.org/dyn/natlex/docs/MONOGRAPH/111680/139299/fr-1243072672/BFA-111680.pdf</a>                                                                                                                                                                                                                   |
|                                                                                                                                  | Plan Stratégique-Santé-des-Adolescents-et-des-Jeunes-2015-2020 -Burkina-Faso                               | 2015-2020                                                                                                                                                                                                                                                                                       | <a href="https://www.prb.org/wp-content/uploads/2018/05/Plan-Strate%CC%81gique-Sante%CC%81-des-Adolescents-et-des-Jeunes-2015-2020 -Burkina-Faso.pdf">https://www.prb.org/wp-content/uploads/2018/05/Plan-Strate%CC%81gique-Sante%CC%81-des-Adolescents-et-des-Jeunes-2015-2020 -Burkina-Faso.pdf</a>                                                                                                             |
|                                                                                                                                  | Normes_en_matiere_de_lab0-analyse_biomed_LABM_BF-2                                                         | 2009                                                                                                                                                                                                                                                                                            | Document shared                                                                                                                                                                                                                                                                                                                                                                                                   |
| Burkina Faso. Plan stratégique de lutte contre le cancer 2013-2017                                                               | 2013-2017                                                                                                  | <a href="https://www.iccp-portal.org/system/files/plans/Burkina%20Faso_Plan%20strat%3%A9gique%20de%20lutte%20contre%20le%20cancer%202013-2017.pdf">https://www.iccp-portal.org/system/files/plans/Burkina%20Faso_Plan%20strat%3%A9gique%20de%20lutte%20contre%20le%20cancer%202013-2017.pdf</a> |                                                                                                                                                                                                                                                                                                                                                                                                                   |
| fy-2019-burkina-faso-malaria-operational-plan                                                                                    | 2019                                                                                                       | <a href="https://d1u4kg159ptc4z.cloudfront.net/uploads/2021/03/fy-2019-burkina-faso-malaria-operational-plan.pdf">https://d1u4kg159ptc4z.cloudfront.net/uploads/2021/03/fy-2019-burkina-faso-malaria-operational-plan.pdf</a>                                                                   |                                                                                                                                                                                                                                                                                                                                                                                                                   |
| Burundi                                                                                                                          | Plan Stratégique National de Laboratoire 2015-2019                                                         | 2015-2019                                                                                                                                                                                                                                                                                       | Document shared                                                                                                                                                                                                                                                                                                                                                                                                   |
|                                                                                                                                  | burundi_tb_2011-2015_fr                                                                                    | 2011-2015                                                                                                                                                                                                                                                                                       | Document shared                                                                                                                                                                                                                                                                                                                                                                                                   |
|                                                                                                                                  | Plan Stratégique National de lutte contre le Paludisme 2018-2023                                           | 2018-2023                                                                                                                                                                                                                                                                                       | <a href="http://misanite.bi/wp-content/uploads/pnlp/Plan%20strat%3%A9gique%20National%20de%20lutte%20contre%20le%20paludisme%202018-2023.pdf">http://misanite.bi/wp-content/uploads/pnlp/Plan%20strat%3%A9gique%20National%20de%20lutte%20contre%20le%20paludisme%202018-2023.pdf</a>                                                                                                                             |
|                                                                                                                                  | PLAN-STRATEGIQUE-NATIONAL-DE-LA-SANTE-DE-LA-REPRODUCTION-MATERNELLE-NEONATALE-INFANTILE-ET-DES-ADOLESCENTS | 2019-2023                                                                                                                                                                                                                                                                                       | <a href="https://share-net-burundi.org/wp-content/uploads/2019/07/PLAN-STRATEGIQUE-NATIONAL-DE-LA-SANTE-DE-LA-REPRODUCTION-MATERNELLE-NEONATALE-INFANTILE-ET-DES-ADOLESCENTS.pdf">https://share-net-burundi.org/wp-content/uploads/2019/07/PLAN-STRATEGIQUE-NATIONAL-DE-LA-SANTE-DE-LA-REPRODUCTION-MATERNELLE-NEONATALE-INFANTILE-ET-DES-ADOLESCENTS.pdf</a>                                                     |
|                                                                                                                                  | Plan Stratégique National de lutte contre le VIH/SIDA 2007-2011                                            | 2007-2011                                                                                                                                                                                                                                                                                       | <a href="https://www.ilo.org/wcmsp5/groups/public/---ed_protect/---protrav/---ilo_aids/documents/legaldocument/wcms_126635.pdf">https://www.ilo.org/wcmsp5/groups/public/---ed_protect/---protrav/---ilo_aids/documents/legaldocument/wcms_126635.pdf</a>                                                                                                                                                         |
|                                                                                                                                  | WHO co-operation with Burundi                                                                              | 2016-2018                                                                                                                                                                                                                                                                                       | <a href="https://apps.who.int/iris/handle/10665/137042?locale-attribute=fr&amp;">https://apps.who.int/iris/handle/10665/137042?locale-attribute=fr&amp;</a>                                                                                                                                                                                                                                                       |
|                                                                                                                                  | PLAN STRATEGIQUE NATIONAL DE LUTTE CONTRE LES MALADIES CHRONIQUES NON TRANSMISSIBLES                       | 2011-2015                                                                                                                                                                                                                                                                                       | <a href="https://www.iccp-portal.org/system/files/plans/BDI_B3_P5%20PNLMCNT%2029%2006%202011%581%5D.pdf">https://www.iccp-portal.org/system/files/plans/BDI_B3_P5%20PNLMCNT%2029%2006%202011%581%5D.pdf</a>                                                                                                                                                                                                       |
|                                                                                                                                  | PLAN D'ACTIVITES DES MALADIES CHRONIQUES NON TRANSMISSIBLES 2017                                           | 2017                                                                                                                                                                                                                                                                                            | <a href="https://www.iccp-portal.org/system/files/plans/BDI_B3_PAA%20FINALE%202017%20Version%20%20%20electronique%2021.pdf">https://www.iccp-portal.org/system/files/plans/BDI_B3_PAA%20FINALE%202017%20Version%20%20%20electronique%2021.pdf</a>                                                                                                                                                                 |
|                                                                                                                                  | burundi_Nat.Plan.AIDS_2014_fr                                                                              | 2014-2017                                                                                                                                                                                                                                                                                       | <a href="http://misanite.bi/wp-content/uploads/pnlc/PSN-VIH%202014-2017.pdf">http://misanite.bi/wp-content/uploads/pnlc/PSN-VIH%202014-2017.pdf</a>                                                                                                                                                                                                                                                               |
|                                                                                                                                  | DIRECTIVES NATIONALES DE PREVENTION ET DE PRISE EN CHARGE DU VIH AU CAMEROUN                               | 2014-2018                                                                                                                                                                                                                                                                                       | <a href="https://www.childrendaids.org/sites/default/files/2017_05/Cameroon_National-Integrated-HIV-Guidelines2014.pdf">https://www.childrendaids.org/sites/default/files/2017_05/Cameroon_National-Integrated-HIV-Guidelines2014.pdf</a>                                                                                                                                                                         |
| Cameroon                                                                                                                         | Guide national de prise en charge des personnes vivant avec le VIH/SIDA - Cameroun                         | 2011                                                                                                                                                                                                                                                                                            | <a href="https://www.aidsmap.com/sites/default/files/legacy/v63477017101330000-file-1052501-guide-national-de-prise-en-charge-des-personnes-vivant-avec-le-vih-sida__e2-88-92-cameroundp.png">https://www.aidsmap.com/sites/default/files/legacy/v63477017101330000-file-1052501-guide-national-de-prise-en-charge-des-personnes-vivant-avec-le-vih-sida__e2-88-92-cameroundp.png</a>                             |
|                                                                                                                                  | GuideBonneExecutionAnalyseBiologieMedicale_dpml_misanite_cameroun                                          | 2011                                                                                                                                                                                                                                                                                            | <a href="https://dpm1.cn/Images/Publications/GuideBonnePratique/GuideBonneExecutionAnalyseBiologieMedicale_dpml_misanite_cameroun.pdf">https://dpm1.cn/Images/Publications/GuideBonnePratique/GuideBonneExecutionAnalyseBiologieMedicale_dpml_misanite_cameroun.pdf</a>                                                                                                                                           |
|                                                                                                                                  | ORGANISATION DES LABORATOIRES SUIVANT LA PYRAMIDE SANITAIRE AU CAMEROUN                                    | 2010                                                                                                                                                                                                                                                                                            | Document shared                                                                                                                                                                                                                                                                                                                                                                                                   |
|                                                                                                                                  | Plan strategique de lutte contre la TB au Cameroun 2015 - 2019                                             | 2015 - 2019                                                                                                                                                                                                                                                                                     | <a href="https://www.pnlc.com/index.php/documentation/plan-strategique-national/4-plan-strategique-national-2020-2024-du-programme-national-de-lutte-contre-la-tuberculose/file">https://www.pnlc.com/index.php/documentation/plan-strategique-national/4-plan-strategique-national-2020-2024-du-programme-national-de-lutte-contre-la-tuberculose/file</a>                                                       |
|                                                                                                                                  | national tuberculosis strategic plan 2010                                                                  | 2010-2014                                                                                                                                                                                                                                                                                       | <a href="https://extranet.who.int/countryplanningcycles/sites/default/files/planning_cycle_repository/cameroon/nationaltuberculosisstrategicplan2010.pdf">https://extranet.who.int/countryplanningcycles/sites/default/files/planning_cycle_repository/cameroon/nationaltuberculosisstrategicplan2010.pdf</a>                                                                                                     |
|                                                                                                                                  | PLAN STRATEGIQUE NATIONAL DE LUTTE CONTRE LE VIH, LE SIDA ET LES IST 2014-2017                             | 2014-2017                                                                                                                                                                                                                                                                                       | <a href="https://www.ilo.org/dyn/natlex/natlex4.detail?p_lang=fr&amp;p_isn=991308p_count=96544">https://www.ilo.org/dyn/natlex/natlex4.detail?p_lang=fr&amp;p_isn=991308p_count=96544</a>                                                                                                                                                                                                                         |
|                                                                                                                                  | National Health Development Plan 2016-2020. Cameroon.                                                      | 2016-2020                                                                                                                                                                                                                                                                                       | <a href="https://www.misanite.com/site/?q=en/content/national-health-development-plan-nhdp-2016-2020">https://www.misanite.com/site/?q=en/content/national-health-development-plan-nhdp-2016-2020</a>                                                                                                                                                                                                             |
|                                                                                                                                  | Plan Stratégique National de Prévention et de Lutte contre le Cancer (PSNPLCa)                             | 2020 - 2024                                                                                                                                                                                                                                                                                     | <a href="https://www.iccp-portal.org/system/files/plans/FINAL%20COP%20PSNPLCa%20RENCH.pdf">https://www.iccp-portal.org/system/files/plans/FINAL%20COP%20PSNPLCa%20RENCH.pdf</a>                                                                                                                                                                                                                                   |
|                                                                                                                                  | FR_DOCUMENT_PLAN STRATEGIQUE NATIONAL DE SANTE NUMERIQUE_Réduit                                            | 2020 - 2024                                                                                                                                                                                                                                                                                     | <a href="https://www.misanite.com/site/?q=en/content/plan-strat%3%A9gique-national-de-sant%3%A9-num%3%A9rique-2020-2024">https://www.misanite.com/site/?q=en/content/plan-strat%3%A9gique-national-de-sant%3%A9-num%3%A9rique-2020-2024</a>                                                                                                                                                                       |
|                                                                                                                                  | HEALTH SECTOR STRATEGY 2016-2027                                                                           | 2016-2027                                                                                                                                                                                                                                                                                       | <a href="https://www.misanite.com/sites/default/files/HSS_english_0.pdf">https://www.misanite.com/sites/default/files/HSS_english_0.pdf</a>                                                                                                                                                                                                                                                                       |
|                                                                                                                                  | PDHR- Etats des lieux des RHS_reduit_0                                                                     | 2013-2017                                                                                                                                                                                                                                                                                       | <a href="http://www.misanite.com/site/?q=fr/content/pdrh-2013-2017-etat-des-lieux-et-diagnostic-des-recources-humaines">http://www.misanite.com/site/?q=fr/content/pdrh-2013-2017-etat-des-lieux-et-diagnostic-des-recources-humaines</a>                                                                                                                                                                         |
|                                                                                                                                  | Cameroun-Plan Stratégique National Paludisme_2019-2023                                                     | 2019-2023                                                                                                                                                                                                                                                                                       | <a href="https://insp-cam.org/wp-content/uploads/2021/10/PSNPL-2019-2023-CONSOLIDE-TRANSMIS.pdf">https://insp-cam.org/wp-content/uploads/2021/10/PSNPL-2019-2023-CONSOLIDE-TRANSMIS.pdf</a>                                                                                                                                                                                                                       |
| Manuel_de_campagne_de_sensibilisation_RHN_de_la_FID                                                                              | 2018                                                                                                       | <a href="https://idf.org/images/Manuel_de_campagne_de_sensibilisation_RHN_de_la_FID.pdf">https://idf.org/images/Manuel_de_campagne_de_sensibilisation_RHN_de_la_FID.pdf</a>                                                                                                                     |                                                                                                                                                                                                                                                                                                                                                                                                                   |
| Plan strategique de lutte contre la TB au Cameroun 2015 - 2019                                                                   | 2015-2019                                                                                                  | Document shared                                                                                                                                                                                                                                                                                 |                                                                                                                                                                                                                                                                                                                                                                                                                   |
| Plan Strategic National du Developm't labo 2018-2020 (1)                                                                         | 2018-2022                                                                                                  | Document shared                                                                                                                                                                                                                                                                                 |                                                                                                                                                                                                                                                                                                                                                                                                                   |
| Central African Rep                                                                                                              | RCA-Plan-National-de-Developpement-Sanitaire-2006-2015                                                     | 2006-2015                                                                                                                                                                                                                                                                                       | <a href="https://www.prb.org/wp-content/uploads/2020/06/RCA-Plan-National-de-Developpement-Sanitaire-2006-2015.pdf">https://www.prb.org/wp-content/uploads/2020/06/RCA-Plan-National-de-Developpement-Sanitaire-2006-2015.pdf</a>                                                                                                                                                                                 |
|                                                                                                                                  | sep2007_PLAN_STRATEGIQUE_SYSTEMESSANTE_RCA_finale                                                          | 2017                                                                                                                                                                                                                                                                                            | <a href="https://www.humanitarianresponse.info/fr/operations/central-african-republic/document/plan-strategique-de-renforcement-des-syst%3CA8mes-de-sant%3CA9">https://www.humanitarianresponse.info/fr/operations/central-african-republic/document/plan-strategique-de-renforcement-des-syst%3CA8mes-de-sant%3CA9</a>                                                                                           |
|                                                                                                                                  | normes_districts_sante_rca                                                                                 | 2016                                                                                                                                                                                                                                                                                            | Document shared                                                                                                                                                                                                                                                                                                                                                                                                   |
|                                                                                                                                  | CADRE STRATEGIQUE NATIONAL DE LUTTE CONTRE LE VIH ET LE SIDA 2012-2016                                     | 2012-2016                                                                                                                                                                                                                                                                                       | <a href="https://www.ilo.org/wcmsp5/groups/public/---ed_protect/---protrav/---ilo_aids/documents/legaldocument/wcms_301805.pdf">https://www.ilo.org/wcmsp5/groups/public/---ed_protect/---protrav/---ilo_aids/documents/legaldocument/wcms_301805.pdf</a>                                                                                                                                                         |
|                                                                                                                                  | Central_African_Republic_2003_Reproductive_Health                                                          | 2003                                                                                                                                                                                                                                                                                            | Document shared                                                                                                                                                                                                                                                                                                                                                                                                   |
|                                                                                                                                  | misp-rca_politique_pnlp_version_finale                                                                     | 2016                                                                                                                                                                                                                                                                                            | <a href="https://www.humanitarianresponse.info/sites/www.humanitarianresponse.info/files/documents/files/misp-rca_politique_pnlp_version_finale.pdf">https://www.humanitarianresponse.info/sites/www.humanitarianresponse.info/files/documents/files/misp-rca_politique_pnlp_version_finale.pdf</a>                                                                                                               |
|                                                                                                                                  | B_rca_plan_strategique_gahu_07_11                                                                          | 2007-2011                                                                                                                                                                                                                                                                                       | <a href="https://www.humanitarianresponse.info/sites/www.humanitarianresponse.info/files/documents/files/misp-rca_politique_pnlp_version_finale.pdf">https://www.humanitarianresponse.info/sites/www.humanitarianresponse.info/files/documents/files/misp-rca_politique_pnlp_version_finale.pdf</a>                                                                                                               |
|                                                                                                                                  | CAF_B3_Plan strat MNT 2015 2021 RCA 7 04 2015                                                              | 2015-2021                                                                                                                                                                                                                                                                                       | <a href="https://www.sante.gov.sn/sites/default/files/Plan%20Strat%3CA9gique_DLMNT.pdf">https://www.sante.gov.sn/sites/default/files/Plan%20Strat%3CA9gique_DLMNT.pdf</a>                                                                                                                                                                                                                                         |
| RCA_Malaria_Amexe 12_PSN paludisme 2018-2022 etendu 2023                                                                         | 2018-2023                                                                                                  | <a href="https://scorecardhub.org/wp-content/uploads/2021/06/drc-plan-strategique-jules-cortige.pdf">https://scorecardhub.org/wp-content/uploads/2021/06/drc-plan-strategique-jules-cortige.pdf</a>                                                                                             |                                                                                                                                                                                                                                                                                                                                                                                                                   |



|                                                                |                                                                                           |                                                                                                                                                                                                                                                                                                     |                                                                                                                                                                                                                                                                                                                                                                                                                                 |
|----------------------------------------------------------------|-------------------------------------------------------------------------------------------|-----------------------------------------------------------------------------------------------------------------------------------------------------------------------------------------------------------------------------------------------------------------------------------------------------|---------------------------------------------------------------------------------------------------------------------------------------------------------------------------------------------------------------------------------------------------------------------------------------------------------------------------------------------------------------------------------------------------------------------------------|
|                                                                | Kenya_National_Diabetes_Strategy                                                          | 2010-2015                                                                                                                                                                                                                                                                                           | <a href="https://www.worlddiabetesfoundation.org/sites/default/files/WDF09-436%20Kenya%20National%20Diabetes%20Strategy%202010-2015%20%20%20Complete.pdf">https://www.worlddiabetesfoundation.org/sites/default/files/WDF09-436%20Kenya%20National%20Diabetes%20Strategy%202010-2015%20%20%20Complete.pdf</a>                                                                                                                   |
|                                                                | Kenya_health_policy_2014_to_2030                                                          | 2014-2030                                                                                                                                                                                                                                                                                           | <a href="http://publications.universahealth2030.org/uploads/kenya_health_policy_2014_to_2030.pdf">http://publications.universahealth2030.org/uploads/kenya_health_policy_2014_to_2030.pdf</a>                                                                                                                                                                                                                                   |
|                                                                | Breast-Cancer-Screening-and-Early-Diagnosis-Action-Plan-2021-2025                         | 2021-2025                                                                                                                                                                                                                                                                                           | <a href="https://www.health.go.ke/wp-content/uploads/2021/10/Breast-Cancer-Screening-and-Early-Diagnosis-Action-Plan-2021-2025.pdf">https://www.health.go.ke/wp-content/uploads/2021/10/Breast-Cancer-Screening-and-Early-Diagnosis-Action-Plan-2021-2025.pdf</a>                                                                                                                                                               |
|                                                                | Norms_and_Standards_for_Health_Service_Delivery_2006                                      | 2006                                                                                                                                                                                                                                                                                                | <a href="http://guidelines.health.go.ke:8000/media/Norms_and_Standards_for_Health_Service_Delivery_2006.pdf">http://guidelines.health.go.ke:8000/media/Norms_and_Standards_for_Health_Service_Delivery_2006.pdf</a>                                                                                                                                                                                                             |
| Lesotho                                                        | LSO_B3_Endorsed_NCD_Strategic_Plan_-_Copy                                                 | 2014-2020                                                                                                                                                                                                                                                                                           | <a href="https://www.iccp-portal.org/system/files/plans/LSO_B3_Endorsed%20NCD%20Strategic%20Plan%20-%20Copy.pdf">https://www.iccp-portal.org/system/files/plans/LSO_B3_Endorsed%20NCD%20Strategic%20Plan%20-%20Copy.pdf</a>                                                                                                                                                                                                     |
|                                                                | Lesotho_Nat_Health_Strat_Plan_2017-2022                                                   | 2017-2022                                                                                                                                                                                                                                                                                           | <a href="https://www.childreandaids.org/sites/default/files/2018-05/Lesotho_Nat%20Health%20Strat%20Plan_2017-2022.pdf">https://www.childreandaids.org/sites/default/files/2018-05/Lesotho_Nat%20Health%20Strat%20Plan_2017-2022.pdf</a>                                                                                                                                                                                         |
|                                                                | National_AIDS_strategic_plan                                                              | 2001-2004                                                                                                                                                                                                                                                                                           | <a href="https://www.prepwatch.org/resources/national-hiv-aids-strategic-plan-2018-19-2022-23/">https://www.prepwatch.org/resources/national-hiv-aids-strategic-plan-2018-19-2022-23/</a>                                                                                                                                                                                                                                       |
|                                                                | Lesotho - Maternal Health Oct 20-final                                                    | 2013                                                                                                                                                                                                                                                                                                | <a href="https://www.undp.org/sites/g/files/zskgkz326/files/publications/Lesotho%20-%20Oct%2020-final.pdf">https://www.undp.org/sites/g/files/zskgkz326/files/publications/Lesotho%20-%20Oct%2020-final.pdf</a>                                                                                                                                                                                                                 |
|                                                                | Lesotho_TB                                                                                |                                                                                                                                                                                                                                                                                                     | Document shared                                                                                                                                                                                                                                                                                                                                                                                                                 |
| Liberia                                                        | Liberia_National_Malaria_Communication_Strategy_2016-2020                                 | 2016-2020                                                                                                                                                                                                                                                                                           | Document shared                                                                                                                                                                                                                                                                                                                                                                                                                 |
|                                                                | Liberia NATIONAL HIV & AIDS STRATEGIC PLAN 2015-2020 Final_Authorized_OK                  | 2015-2020                                                                                                                                                                                                                                                                                           | <a href="https://www.childreandaids.org/node/444#:~:text=The%20NSP%20aims%20to%20reduce_positive%20mothers%20on%20ifelong%20antiretroviral">https://www.childreandaids.org/node/444#:~:text=The%20NSP%20aims%20to%20reduce_positive%20mothers%20on%20ifelong%20antiretroviral</a>                                                                                                                                               |
|                                                                | Liberia National Leprosy and Tuberculosis Strategic Plan 2014 - 2018                      | 2014-2018                                                                                                                                                                                                                                                                                           | <a href="https://icm.org.tr/wp-content/uploads/2021/09/TB-and-Leprosy-Strategic-Plan-2014-2018-consolidated-1-1.pdf">https://icm.org.tr/wp-content/uploads/2021/09/TB-and-Leprosy-Strategic-Plan-2014-2018-consolidated-1-1.pdf</a>                                                                                                                                                                                             |
|                                                                | liberia_maternal_and_newborn_health_roadmap                                               | 2007                                                                                                                                                                                                                                                                                                | Document shared                                                                                                                                                                                                                                                                                                                                                                                                                 |
|                                                                | Liberia Family Planning Costed Implementation Plan: 2018-2022                             | 2018-2022                                                                                                                                                                                                                                                                                           | <a href="http://www.healthpolicyplus.com/ns/pubs/10246-11503_LiberiaCIPBrief.pdf">http://www.healthpolicyplus.com/ns/pubs/10246-11503_LiberiaCIPBrief.pdf</a>                                                                                                                                                                                                                                                                   |
|                                                                | Other/pandemic/ Labs investment plan_for_building_a_resilient_health_system               |                                                                                                                                                                                                                                                                                                     | Document shared                                                                                                                                                                                                                                                                                                                                                                                                                 |
|                                                                | updated HIV treatment guidelines                                                          | 2020                                                                                                                                                                                                                                                                                                | <a href="https://au.int/web/sites/default/files/newsevents/workingdocuments/27027-wd-liberia_investment_plan_for_building_a_resilient_health_system.pdf">https://au.int/web/sites/default/files/newsevents/workingdocuments/27027-wd-liberia_investment_plan_for_building_a_resilient_health_system.pdf</a>                                                                                                                     |
|                                                                | Liberia national health and social welfare                                                |                                                                                                                                                                                                                                                                                                     | <a href="https://taoex.fao.org/docs/pdf/1br204463.pdf">https://taoex.fao.org/docs/pdf/1br204463.pdf</a>                                                                                                                                                                                                                                                                                                                         |
|                                                                | Liberia mental health Policy and strategy                                                 | 2016-2021                                                                                                                                                                                                                                                                                           | <a href="https://www.afro.who.int/sites/default/files/2017-06/Mental%20Health%20Policy%20and%20Strategic%20Plan%20for%20Liberia%202016%20-%202021%20.pdf">https://www.afro.who.int/sites/default/files/2017-06/Mental%20Health%20Policy%20and%20Strategic%20Plan%20for%20Liberia%202016%20-%202021%20.pdf</a>                                                                                                                   |
|                                                                | IHR-PVS NATIONAL BRIDGING WORKSHOP FOR LIBERIA                                            |                                                                                                                                                                                                                                                                                                     | <a href="https://extranet.who.int/sph/sites/default/files/NBW%20Liberia-Final%20report.pdf">https://extranet.who.int/sph/sites/default/files/NBW%20Liberia-Final%20report.pdf</a>                                                                                                                                                                                                                                               |
| LIBERIA_Neglected_Tropical_Diseases_Master_Plan_2016_2020      | 2016-2020                                                                                 | <a href="https://espen.afro.who.int/system/files/content/resources/LIBERIA_NTD_Master_Plan_2016_2020.pdf">https://espen.afro.who.int/system/files/content/resources/LIBERIA_NTD_Master_Plan_2016_2020.pdf</a>                                                                                       |                                                                                                                                                                                                                                                                                                                                                                                                                                 |
| Liberia-National Standard Therapeutic Guidelines and Essential | 2017                                                                                      | <a href="https://pdf.usaid.gov/pdf_docs/PAD01FW.pdf">https://pdf.usaid.gov/pdf_docs/PAD01FW.pdf</a>                                                                                                                                                                                                 |                                                                                                                                                                                                                                                                                                                                                                                                                                 |
| (LIBERIA) Essential Package of Health Services (2011)          | 2011                                                                                      | <a href="https://www.hfproject.org/essential-package-of-health-services-country-snapshot-liberia/">https://www.hfproject.org/essential-package-of-health-services-country-snapshot-liberia/</a>                                                                                                     |                                                                                                                                                                                                                                                                                                                                                                                                                                 |
| Liberia-EPI-FP-Integration-Study-Report                        | 2018                                                                                      | Document shared                                                                                                                                                                                                                                                                                     |                                                                                                                                                                                                                                                                                                                                                                                                                                 |
| TERMS OF REFERENCE THE NATIONAL STANDARDS LABORATORY           |                                                                                           | <a href="https://www.fao.org/3/ca7509en/ca7509en.pdf">https://www.fao.org/3/ca7509en/ca7509en.pdf</a>                                                                                                                                                                                               |                                                                                                                                                                                                                                                                                                                                                                                                                                 |
| Medicines List -EML-2nd-Edition-2017                           |                                                                                           | <a href="https://www.mexbox.org/pdf/5e148832b60a2044c2d4c5">https://www.mexbox.org/pdf/5e148832b60a2044c2d4c5</a>                                                                                                                                                                                   |                                                                                                                                                                                                                                                                                                                                                                                                                                 |
| Madagascar                                                     | 17365-17659_PSNRSC                                                                        | 2019-2030                                                                                                                                                                                                                                                                                           | <a href="http://www.healthpolicyplus.com/ns/pubs/17365-17659_PSNRSC.pdf">http://www.healthpolicyplus.com/ns/pubs/17365-17659_PSNRSC.pdf</a>                                                                                                                                                                                                                                                                                     |
| Malawi                                                         | Malawi Q2017 - 2022 National Laboratory Strategic Plan Approved Version June 2018         | 2017 - 2022                                                                                                                                                                                                                                                                                         | <a href="https://extranet.who.int/countryplanningcycles/sites/default/files/planning_cycle_repository/malawi/health_sector_strategic_plan_ill_030417_smt_dps.pdf">https://extranet.who.int/countryplanningcycles/sites/default/files/planning_cycle_repository/malawi/health_sector_strategic_plan_ill_030417_smt_dps.pdf</a>                                                                                                   |
|                                                                | Malawi Malaria Strategic Plan 2017                                                        | 2017 - 2022                                                                                                                                                                                                                                                                                         | <a href="https://d1u4kz19pt4z.cloudfront.net/uploads/2021/03/fy-2017-malawi-malaria-operational-plan.pdf">https://d1u4kz19pt4z.cloudfront.net/uploads/2021/03/fy-2017-malawi-malaria-operational-plan.pdf</a>                                                                                                                                                                                                                   |
|                                                                | Malawi-National-HIV-AIDS-Strategic-Plan-2015-2020                                         | 2015-2020                                                                                                                                                                                                                                                                                           | <a href="https://www.childreandaids.org/sites/default/files/2017-11/Malawi-National-HIV-AIDS-Strategic-Plan-2015-2020.pdf">https://www.childreandaids.org/sites/default/files/2017-11/Malawi-National-HIV-AIDS-Strategic-Plan-2015-2020.pdf</a>                                                                                                                                                                                 |
|                                                                | Malawi National Laboratory Policy Approved Version 13-03-2018                             | 2017                                                                                                                                                                                                                                                                                                | Document shared                                                                                                                                                                                                                                                                                                                                                                                                                 |
|                                                                | Malawi Revised Malaria Treatment Guidelines 5th Edition 2020_Final_Signed[94]             | 2020                                                                                                                                                                                                                                                                                                | Document shared                                                                                                                                                                                                                                                                                                                                                                                                                 |
|                                                                | Malawi National Strategic plan tuberculosis and leprosy                                   | 2021-2025                                                                                                                                                                                                                                                                                           | <a href="https://nhkhw.kuhs.ac.mw/handle/20.500.12845/200#:~:text=The%20Plan%20seeks%20to%20further,TB%2FHIV%20collaborative%20activities%20and">https://nhkhw.kuhs.ac.mw/handle/20.500.12845/200#:~:text=The%20Plan%20seeks%20to%20further,TB%2FHIV%20collaborative%20activities%20and</a>                                                                                                                                     |
|                                                                | Malawi Updated escp (COVID and pandemic preparedness)                                     | 2021                                                                                                                                                                                                                                                                                                | Document shared                                                                                                                                                                                                                                                                                                                                                                                                                 |
|                                                                | Health Sector Strategic Plan                                                              | 2011-2016                                                                                                                                                                                                                                                                                           | <a href="https://www.res.kos.org/sites/default/files/Malawi%20MH%202021%20Malawi%20Health%20Sector%20Strategic%20Plan%202021%20-%2020216.pdf">https://www.res.kos.org/sites/default/files/Malawi%20MH%202021%20Malawi%20Health%20Sector%20Strategic%20Plan%202021%20-%2020216.pdf</a>                                                                                                                                           |
|                                                                | Malawi ENAP - infant mortality reduction                                                  |                                                                                                                                                                                                                                                                                                     | <a href="https://cdn.who.int/media/docs/default-source/mca-documents/nbh/enap-country-progress-tracking-report-2015-2016-v2.pdf?sfvrsn=41945d17_1&amp;download=true">https://cdn.who.int/media/docs/default-source/mca-documents/nbh/enap-country-progress-tracking-report-2015-2016-v2.pdf?sfvrsn=41945d17_1&amp;download=true</a>                                                                                             |
|                                                                | national community strategy                                                               | 2017 - 2022                                                                                                                                                                                                                                                                                         | <a href="https://chc.wcentral.org/resources/national-community-health-strategy-malawi/#:~:text=The%20main%20focus%20of%20this,supplies%20%20transportation%20%20and%20infrastructure.">https://chc.wcentral.org/resources/national-community-health-strategy-malawi/#:~:text=The%20main%20focus%20of%20this,supplies%20%20transportation%20%20and%20infrastructure.</a>                                                         |
| Malawi Lab standardization                                     | 2009                                                                                      | <a href="https://pdf.usaid.gov/pdf_docs/Pnadr853.pdf">https://pdf.usaid.gov/pdf_docs/Pnadr853.pdf</a>                                                                                                                                                                                               |                                                                                                                                                                                                                                                                                                                                                                                                                                 |
| TB Laboratory Netow Operational Plan_Malawi 26 April           | 2021-2025                                                                                 | Document shared                                                                                                                                                                                                                                                                                     |                                                                                                                                                                                                                                                                                                                                                                                                                                 |
| Mali                                                           | MU_B3_Plan strategique MNT adopté en CM le 22 octobre 2014                                | 2015-2019                                                                                                                                                                                                                                                                                           | <a href="https://www.iccp-portal.org/system/files/plans/MU_B3_Plan%20strategie%20MNT%20adopté%20en%20CM%20le%2022%20octobre%20%202014.pdf">https://www.iccp-portal.org/system/files/plans/MU_B3_Plan%20strategie%20MNT%20adopté%20en%20CM%20le%2022%20octobre%20%202014.pdf</a>                                                                                                                                                 |
|                                                                | MH_StrategicPlan_2021                                                                     | 2017-2021                                                                                                                                                                                                                                                                                           | <a href="https://malhealth.org/wp-content/uploads/2018/04/MH_StrategicPlan_2021.pdf">https://malhealth.org/wp-content/uploads/2018/04/MH_StrategicPlan_2021.pdf</a>                                                                                                                                                                                                                                                             |
| Mauritania                                                     | projet de preparation de reponse strategique contre la COVID 19                           | 2020                                                                                                                                                                                                                                                                                                | Document shared                                                                                                                                                                                                                                                                                                                                                                                                                 |
|                                                                | VIH                                                                                       | 2012-2020                                                                                                                                                                                                                                                                                           | Document shared                                                                                                                                                                                                                                                                                                                                                                                                                 |
|                                                                | health technology national policy                                                         | 2005-2015                                                                                                                                                                                                                                                                                           | Document shared                                                                                                                                                                                                                                                                                                                                                                                                                 |
|                                                                | Plan Nationale de Development Sanitaire                                                   | 2012-2020                                                                                                                                                                                                                                                                                           | Document shared                                                                                                                                                                                                                                                                                                                                                                                                                 |
| Mauritius                                                      | Form_B_indicative_procurement_plan_final                                                  | 2021-2022                                                                                                                                                                                                                                                                                           | Document shared                                                                                                                                                                                                                                                                                                                                                                                                                 |
|                                                                | NASA (National AIDS Spending Assessment)                                                  | 2018                                                                                                                                                                                                                                                                                                | <a href="https://health.govmu.org/Documents/Legislations/Documents/NASA%20Report%202018%2017%20AUG%202020%20%28%29.pdf">https://health.govmu.org/Documents/Legislations/Documents/NASA%20Report%202018%2017%20AUG%202020%20%28%29.pdf</a>                                                                                                                                                                                       |
|                                                                | Mauritius TB manual                                                                       | 2018                                                                                                                                                                                                                                                                                                | <a href="https://health.govmu.org/Documents/Departments-Hospitals/Departments/Documents/MANAGEMENT%20PROTOCOL%20FOR%20TUBERCULOSIS%20IN%20MAURITIUS%202018%20Final.pdf">https://health.govmu.org/Documents/Departments-Hospitals/Departments/Documents/MANAGEMENT%20PROTOCOL%20FOR%20TUBERCULOSIS%20IN%20MAURITIUS%202018%20Final.pdf</a>                                                                                       |
|                                                                | sexual and reproductive health strategy and plan                                          | 2009-2015                                                                                                                                                                                                                                                                                           | <a href="https://healtheducationresources.unesco.org/sites/default/files/resources/mauritius_sexual_reproductive_health_strategy_plan_2009-2015.pdf">https://healtheducationresources.unesco.org/sites/default/files/resources/mauritius_sexual_reproductive_health_strategy_plan_2009-2015.pdf</a>                                                                                                                             |
|                                                                | National plan for COVID 19 resurgence                                                     | 2021                                                                                                                                                                                                                                                                                                | <a href="https://health.govmu.org/Documents/Main%20Page/Communicable_Diseases/NATIONAL%20RESPONSE%20AND%20CONTINGENCY%20PLAN%20IN%20THE%20EVENTUALITY%20OF%20A%20RESURGENCE%20OF%20COVID-19%20CIRCULATION.pdf">https://health.govmu.org/Documents/Main%20Page/Communicable_Diseases/NATIONAL%20RESPONSE%20AND%20CONTINGENCY%20PLAN%20IN%20THE%20EVENTUALITY%20OF%20A%20RESURGENCE%20OF%20COVID-19%20CIRCULATION.pdf</a>         |
|                                                                | NATIONAL ACTION PLAN ON ANTIMICROBIAL RESISTANCE                                          | 2017-2021                                                                                                                                                                                                                                                                                           | <a href="https://www.who.int/publications/m/item/mauritius-national-action-plan-on-antimicrobial-resistance">https://www.who.int/publications/m/item/mauritius-national-action-plan-on-antimicrobial-resistance</a>                                                                                                                                                                                                             |
|                                                                | NATIONAL ACTION PLAN FOR THE PREVENTION AND CONTROL OF PLAGUE                             | 2021                                                                                                                                                                                                                                                                                                | <a href="https://health.govmu.org/Documents/Main%20Page/Communicable_Diseases/NATIONAL%20ACTION%20PLAN%20FOR%20THE%20PREVENTION%20AND%20CONTROL%20OF%20PLAGUE.pdf">https://health.govmu.org/Documents/Main%20Page/Communicable_Diseases/NATIONAL%20ACTION%20PLAN%20FOR%20THE%20PREVENTION%20AND%20CONTROL%20OF%20PLAGUE.pdf</a>                                                                                                 |
|                                                                | national preparedness plan for Ebola virus                                                | 2014                                                                                                                                                                                                                                                                                                | <a href="https://health.govmu.org/Documents/Main%20Page/Communicable_Diseases/NATIONAL%20PREPAREDNESS%20PLAN%20ON%20EBOLA%20VIRUS%20DISEASE.pdf">https://health.govmu.org/Documents/Main%20Page/Communicable_Diseases/NATIONAL%20PREPAREDNESS%20PLAN%20ON%20EBOLA%20VIRUS%20DISEASE.pdf</a>                                                                                                                                     |
| Health Sector Strategic Plan Final 15 September 2020           | 2020-2024                                                                                 | <a href="https://health.govmu.org/Communique/HSP%20Final%2015%20September%202020.pdf">https://health.govmu.org/Communique/HSP%20Final%2015%20September%202020.pdf</a>                                                                                                                               |                                                                                                                                                                                                                                                                                                                                                                                                                                 |
| Mozambique                                                     | mozambique_ _health_sector_strategic_plan_ _ 2014-2019                                    | 2014-2019                                                                                                                                                                                                                                                                                           | <a href="https://extranet.who.int/countryplanningcycles/sites/default/files/planning_cycle_repository/mozambique/mozambique_ _health_sector_strategic_plan_ _ 2014-2019.pdf">https://extranet.who.int/countryplanningcycles/sites/default/files/planning_cycle_repository/mozambique/mozambique_ _health_sector_strategic_plan_ _ 2014-2019.pdf</a>                                                                             |
|                                                                | Plano Estratégico_PNCT 2008-2012                                                          | 2008-2012                                                                                                                                                                                                                                                                                           | <a href="http://www.scribd.com/document/49588106/Plano-Estrategico-PNCT-2008-2012-pdf">http://www.scribd.com/document/49588106/Plano-Estrategico-PNCT-2008-2012-pdf</a>                                                                                                                                                                                                                                                         |
|                                                                | Maternal and Child Health Integrated Program (MCHIP)                                      | 2015                                                                                                                                                                                                                                                                                                | <a href="https://pdf.usaid.gov/pdf_docs/PAD01XH1.pdf">https://pdf.usaid.gov/pdf_docs/PAD01XH1.pdf</a>                                                                                                                                                                                                                                                                                                                           |
|                                                                | RAPID ASSESSMENT PROTOCOL FOR INSULIN ACCESS IN MOZAMBIQUE                                | 2009                                                                                                                                                                                                                                                                                                | <a href="https://www.accessinsulin.org/uploads/4/9/1/0/4910107/mozambique_rapia_report_2009.pdf">https://www.accessinsulin.org/uploads/4/9/1/0/4910107/mozambique_rapia_report_2009.pdf</a>                                                                                                                                                                                                                                     |
|                                                                | Implementing Laboratory Quality Management Systems in Mozambique                          | 2011-12                                                                                                                                                                                                                                                                                             | <a href="https://core.ac.uk/download/pdf/144171747.pdf">https://core.ac.uk/download/pdf/144171747.pdf</a>                                                                                                                                                                                                                                                                                                                       |
|                                                                | Country Operational Plan for HIV                                                          | 2021                                                                                                                                                                                                                                                                                                | <a href="https://www.state.gov/wp-content/uploads/2022/09/Mozambique-COP22-SDS-.pdf">https://www.state.gov/wp-content/uploads/2022/09/Mozambique-COP22-SDS-.pdf</a>                                                                                                                                                                                                                                                             |
| NCD Joint programming mission, 2-6 November 2015               | 2015                                                                                      | <a href="https://apps.who.int/iris/bitstream/handle/10665/275774/WHO-NMH-NMA-18.79-eng.pdf?sequence=1&amp;isAllowed=y">https://apps.who.int/iris/bitstream/handle/10665/275774/WHO-NMH-NMA-18.79-eng.pdf?sequence=1&amp;isAllowed=y</a>                                                             |                                                                                                                                                                                                                                                                                                                                                                                                                                 |
| NATIONAL MALARIA CONTROL PROGRAMME                             | 2017-2022                                                                                 | <a href="https://pdf.usaid.gov/pdf_docs/PAD08BCM.pdf">https://pdf.usaid.gov/pdf_docs/PAD08BCM.pdf</a>                                                                                                                                                                                               |                                                                                                                                                                                                                                                                                                                                                                                                                                 |
| Namibia                                                        | Country Cooperation Strategy Namibia - 07 August 2019                                     | 2018-2022                                                                                                                                                                                                                                                                                           | <a href="https://www.afro.who.int/sites/default/files/2019-12/CCS%20Namibia%20-%2007%20August%202019.pdf">https://www.afro.who.int/sites/default/files/2019-12/CCS%20Namibia%20-%2007%20August%202019.pdf</a>                                                                                                                                                                                                                   |
|                                                                | Namibia Malaria Strategic Plan 2010-2016                                                  | 2010-2016                                                                                                                                                                                                                                                                                           | <a href="https://endmalaria.org/sites/default/files/namibia2010-2016.pdf">https://endmalaria.org/sites/default/files/namibia2010-2016.pdf</a>                                                                                                                                                                                                                                                                                   |
|                                                                | National Strategic Framework for HIV 2017_2022                                            | 2017_2022                                                                                                                                                                                                                                                                                           | <a href="https://hivpreventioncoalition.unaids.org/country-action/namibia-hiv-aids-national-strategic-framework/">https://hivpreventioncoalition.unaids.org/country-action/namibia-hiv-aids-national-strategic-framework/</a>                                                                                                                                                                                                   |
|                                                                | National-Guidelines-for-the-Management-of-Tuberculosis-Fourth-Edition-2019                | 2019                                                                                                                                                                                                                                                                                                | <a href="https://www.mhss.gov.na/documents/146502/1042285/National-Guidelines-for-the-Management-of-Tuberculosis-Fourth-Edition-2019-2.pdf?c=3676019-3205-4ed8-50dd-4fb301c3fda17e1657527637226&amp;download=true">https://www.mhss.gov.na/documents/146502/1042285/National-Guidelines-for-the-Management-of-Tuberculosis-Fourth-Edition-2019-2.pdf?c=3676019-3205-4ed8-50dd-4fb301c3fda17e1657527637226&amp;download=true</a> |
|                                                                | namibia_national_health_policy_framework_2010-2020                                        | 2010-2020                                                                                                                                                                                                                                                                                           | <a href="https://extranet.who.int/countryplanningcycles/sites/default/files/country_docs/Namibia/namibia_national_health_policy_framework_2010-2020.pdf">https://extranet.who.int/countryplanningcycles/sites/default/files/country_docs/Namibia/namibia_national_health_policy_framework_2010-2020.pdf</a>                                                                                                                     |
|                                                                | Namibia National Supply Chain Assessment Results                                          | 2013                                                                                                                                                                                                                                                                                                | <a href="https://www.mexbox.org/document/namibia-national-supply-chain-assessment-resultsIGO">https://www.mexbox.org/document/namibia-national-supply-chain-assessment-resultsIGO</a>                                                                                                                                                                                                                                           |
|                                                                | NAMIBIA NATIONAL MULTISECTORAL STRATEGIC PLAN FOR PREVENTION AND CONTROL OF NCDs          |                                                                                                                                                                                                                                                                                                     | <a href="https://www.iccp-portal.org/system/files/plans/NAMIBIA%20NATIONAL%20MULTISECTORAL%20STRATEGIC%20PLAN%20FOR%20PREVENTION%20AND%20CONTROL%20OF%20NCDs.pdf">https://www.iccp-portal.org/system/files/plans/NAMIBIA%20NATIONAL%20MULTISECTORAL%20STRATEGIC%20PLAN%20FOR%20PREVENTION%20AND%20CONTROL%20OF%20NCDs.pdf</a>                                                                                                   |
| National Human Resources for Health Strategic Plan             | 2020-2030                                                                                 | <a href="https://pdf.usaid.gov/pdf_docs/PAD0X195.pdf">https://pdf.usaid.gov/pdf_docs/PAD0X195.pdf</a>                                                                                                                                                                                               |                                                                                                                                                                                                                                                                                                                                                                                                                                 |
| Establishing a Public Health Laboratory System                 | 2010-2020                                                                                 | <a href="https://www.sph.org/conferences/proceedings/Documents/2014/Annual-Meeting/16%20Kaura.pdf">https://www.sph.org/conferences/proceedings/Documents/2014/Annual-Meeting/16%20Kaura.pdf</a>                                                                                                     |                                                                                                                                                                                                                                                                                                                                                                                                                                 |
| Namibia Health Facility Census                                 | 2020-2030                                                                                 | <a href="https://shopplusproject.org/sites/default/files/resources/Namibia%20Private%20Health%20Providers%20and%20Facilities%20Census%20Results.pdf">https://shopplusproject.org/sites/default/files/resources/Namibia%20Private%20Health%20Providers%20and%20Facilities%20Census%20Results.pdf</a> |                                                                                                                                                                                                                                                                                                                                                                                                                                 |
| Niger                                                          | Niger_Nat Strat Plan HIV_2008-2012                                                        | 2008-2012                                                                                                                                                                                                                                                                                           | <a href="https://www.childreandaids.org/sites/default/files/2018-05/Niger_Nat%20Strat%20Plan%20HIV_2008-2012.pdf">https://www.childreandaids.org/sites/default/files/2018-05/Niger_Nat%20Strat%20Plan%20HIV_2008-2012.pdf</a>                                                                                                                                                                                                   |
|                                                                | NER_B3_Plan Strategique PNLMT Niger                                                       | 2012                                                                                                                                                                                                                                                                                                | <a href="https://www.iccp-portal.org/system/files/plans/NER_B3_Plan%20Strat%20C3%20A9igique%20PNLMT%20Niger.pdf">https://www.iccp-portal.org/system/files/plans/NER_B3_Plan%20Strat%20C3%20A9igique%20PNLMT%20Niger.pdf</a>                                                                                                                                                                                                     |
|                                                                | PSN_NIGER_Malaria_2017_2_12_2016                                                          | 2017-2021                                                                                                                                                                                                                                                                                           | <a href="https://extranet.who.int/nutrition/gina/sites/default/files/store/NER%202019%20Plan%20Strat%20C3%20A9igique%20onational%20MNT.pdf">https://extranet.who.int/nutrition/gina/sites/default/files/store/NER%202019%20Plan%20Strat%20C3%20A9igique%20onational%20MNT.pdf</a>                                                                                                                                               |
|                                                                | RevisedNationalHealthPolicyDocument                                                       | 2004                                                                                                                                                                                                                                                                                                | <a href="http://idp.library.ug.ac.ug/4431/andw/123456789/1178">http://idp.library.ug.ac.ug/4431/andw/123456789/1178</a>                                                                                                                                                                                                                                                                                                         |
| Nigeria                                                        | NATIONAL-HIV-AND-AIDS-STRATEGIC-FRAMEWORK                                                 | 2017-2021                                                                                                                                                                                                                                                                                           | <a href="https://www.aidsdatahub.org/resource/national-hiv-strategic-plan-2021-2026#:~:text=The%20National%20HIV%20Strategic%20Plan,at%20people%20living%20with%20HIV.">https://www.aidsdatahub.org/resource/national-hiv-strategic-plan-2021-2026#:~:text=The%20National%20HIV%20Strategic%20Plan,at%20people%20living%20with%20HIV.</a>                                                                                       |
|                                                                | Nigeria_National_Malaria_Strategic_Plan2020                                               | 2014-2020                                                                                                                                                                                                                                                                                           | <a href="https://www.health.gov.ng/doc/NMSP-Strategic-Plan.pdf">https://www.health.gov.ng/doc/NMSP-Strategic-Plan.pdf</a>                                                                                                                                                                                                                                                                                                       |
|                                                                | USAID Global Health Supply Chain Program-Procurement Supply Management (GHSC-PSM) Nigeria | 2020                                                                                                                                                                                                                                                                                                | <a href="https://www.ghsupplychain.org/country-profile/nigeria">https://www.ghsupplychain.org/country-profile/nigeria</a>                                                                                                                                                                                                                                                                                                       |
|                                                                | Child Survival in Nigeria: Situation, Response, and Prospects                             | 2002                                                                                                                                                                                                                                                                                                | <a href="http://www.policyproject.com/pubs/countryreports/nig_crsvised.pdf">http://www.policyproject.com/pubs/countryreports/nig_crsvised.pdf</a>                                                                                                                                                                                                                                                                               |
|                                                                | National Policy Strategic Plan NCD                                                        | 2013                                                                                                                                                                                                                                                                                                | <a href="https://www.iccp-portal.org/national-policy-and-strategic-plan-action-prevention-and-control-non-communicable-diseases-ncds">https://www.iccp-portal.org/national-policy-and-strategic-plan-action-prevention-and-control-non-communicable-diseases-ncds</a>                                                                                                                                                           |

|                       |                                                                                                                       |                    |                                                                                                                                                                                                                                                                                                                                                                                                                                                                                                       |
|-----------------------|-----------------------------------------------------------------------------------------------------------------------|--------------------|-------------------------------------------------------------------------------------------------------------------------------------------------------------------------------------------------------------------------------------------------------------------------------------------------------------------------------------------------------------------------------------------------------------------------------------------------------------------------------------------------------|
|                       | Nigeria National Essential Diagnostics List                                                                           |                    | Document shared                                                                                                                                                                                                                                                                                                                                                                                                                                                                                       |
|                       | SECOND NATIONAL STRATEGIC HEALTH DEVELOPMENT PLAN                                                                     | 2018-2022          | <a href="https://nfdregistry.org.ng/8443/spu/bitstream/123456789/3283/1/SECOND%20NATIONAL%20STRATEGIC%20HEALTH%20DEVELOPMENT%20PLAN%202018%20-%202022.pdf">https://nfdregistry.org.ng/8443/spu/bitstream/123456789/3283/1/SECOND%20NATIONAL%20STRATEGIC%20HEALTH%20DEVELOPMENT%20PLAN%202018%20-%202022.pdf</a>                                                                                                                                                                                       |
|                       | TB CRG Action Plan Nigeria                                                                                            | 2021-2025          | <a href="https://stoph.org/assets/documents/communities/CRG/TB%20CRG%20Action%20Plan%20Nigeria.pdf">https://stoph.org/assets/documents/communities/CRG/TB%20CRG%20Action%20Plan%20Nigeria.pdf</a>                                                                                                                                                                                                                                                                                                     |
|                       | National Guidelines for Setting up Medical Lab in Nigeria-1                                                           | 2012               | <a href="http://www.mlcn-as.org/document/National%20Guidelines%20for%20Setting%20up%20Medical%20Lab%20in%20Nigeria-1.pdf">http://www.mlcn-as.org/document/National%20Guidelines%20for%20Setting%20up%20Medical%20Lab%20in%20Nigeria-1.pdf</a>                                                                                                                                                                                                                                                         |
| Réunion               | PRS_plan_strategique_24_07.pdf                                                                                        | 2012-2016          | <a href="https://www.lreunion.ars.sante.fr/prs-2012-2016-5">https://www.lreunion.ars.sante.fr/prs-2012-2016-5</a>                                                                                                                                                                                                                                                                                                                                                                                     |
|                       | Consultation on Technical and Operational Recommendations for Clinical Laboratory Testing Harmonization and Standards | 2008               | <a href="http://www.pdfcrowd.com/2018/08/20/consultation-on-technical-and-operational-recommendations-for-clinical-laboratory-testing-harmonization-and-standards/">http://www.pdfcrowd.com/2018/08/20/consultation-on-technical-and-operational-recommendations-for-clinical-laboratory-testing-harmonization-and-standards/</a>                                                                                                                                                                     |
|                       | Rwanda Strategic Plan for HIV Extended to 2020                                                                        | 2013-2020          | <a href="https://trc.gov.rw/IMG/pdf/rwanda_hiv_aids_2020_and_2030_targets.pdf">https://trc.gov.rw/IMG/pdf/rwanda_hiv_aids_2020_and_2030_targets.pdf</a>                                                                                                                                                                                                                                                                                                                                               |
|                       | Tuberculosis National Strategic Plan                                                                                  | 2013-2018          | <a href="https://trc.gov.rw/fileadmin/user_upload/report/2019/2%20%20Extended%20TB%20NSP%202018-2020_March_2017.pdf">https://trc.gov.rw/fileadmin/user_upload/report/2019/2%20%20Extended%20TB%20NSP%202018-2020_March_2017.pdf</a>                                                                                                                                                                                                                                                                   |
|                       | Republic of Rwanda National Community Health Policy                                                                   | 2020-2024          | <a href="https://www.advancingpartners.org/sites/default/files/projects/policies/chp_rwanda_2008.pdf">https://www.advancingpartners.org/sites/default/files/projects/policies/chp_rwanda_2008.pdf</a>                                                                                                                                                                                                                                                                                                 |
|                       | pdf_approval_procurement_plan_2019-2020                                                                               | 2019-20            | <a href="https://mpe.gov.rw/documents/105739/105862/Annual-Procurement-Plan+2019-2020.pdf/650c9d5-5ea4-5543-654f-Sace0919325">https://mpe.gov.rw/documents/105739/105862/Annual-Procurement-Plan+2019-2020.pdf/650c9d5-5ea4-5543-654f-Sace0919325</a>                                                                                                                                                                                                                                                 |
|                       | Strategic NCDs framework and targets settings in Rwanda                                                               | 7/7/2015           | <a href="http://ncdsynergies.org/wp-content/uploads/2015/07/Rwanda-Target-Setting_Paolo-dAcq-NCDSynergies.pdf">http://ncdsynergies.org/wp-content/uploads/2015/07/Rwanda-Target-Setting_Paolo-dAcq-NCDSynergies.pdf</a>                                                                                                                                                                                                                                                                               |
|                       | Rwanda: Harmonized LMS System Design Review and SOP/Curriculum Development                                            | date not available | <a href="https://publications.jsi.com/JSIinternet/Inc/Common/_download_pub.cfm?id=17421&amp;lid=3">https://publications.jsi.com/JSIinternet/Inc/Common/_download_pub.cfm?id=17421&amp;lid=3</a>                                                                                                                                                                                                                                                                                                       |
|                       | Trends in MCH-RWANDA                                                                                                  | 7/7/2015           | <a href="https://dhsprogram.com/pubs/pdf/FA108/FA108.pdf">https://dhsprogram.com/pubs/pdf/FA108/FA108.pdf</a>                                                                                                                                                                                                                                                                                                                                                                                         |
|                       | Key Findings on Family Planning, Maternal and Child Health, and Malaria                                               | 7/1/1905           | Document shared                                                                                                                                                                                                                                                                                                                                                                                                                                                                                       |
|                       | Obesity-MOH Clinical Practice Guidelines_main                                                                         | 7/9/1905           | Document shared                                                                                                                                                                                                                                                                                                                                                                                                                                                                                       |
|                       | RWANDA MALARIA STRATEGIC PLAN                                                                                         | 2020-2024          | <a href="https://d1u4g1s9tct4z.cloudfront.net/uploads/2022/01/FY-2022-Rwanda-MOP.pdf">https://d1u4g1s9tct4z.cloudfront.net/uploads/2022/01/FY-2022-Rwanda-MOP.pdf</a>                                                                                                                                                                                                                                                                                                                                 |
|                       | Senegal Plan for maternal newborn and family planning 2010 French                                                     | 2010               | <a href="https://www.unfpa.org/sites/default/files/admin-resource/Senegal%20Plan%20for%20maternal%20newborn%20and%20family%20planning%202010%20French.pdf">https://www.unfpa.org/sites/default/files/admin-resource/Senegal%20Plan%20for%20maternal%20newborn%20and%20family%20planning%202010%20French.pdf</a>                                                                                                                                                                                       |
|                       | PLAN STRATEGIQUE LUTTE CONTRE LES MALADIES NON TRANSMISSIBLES                                                         | 2017-2020          | <a href="https://www.sante.gov.sn/sites/default/files/Plan%20Strat%20C3%A9grique_DLMNT.pdf">https://www.sante.gov.sn/sites/default/files/Plan%20Strat%20C3%A9grique_DLMNT.pdf</a>                                                                                                                                                                                                                                                                                                                     |
|                       | Senegal_Nat Strat Plan HIV_2011-2015 fr                                                                               | 2011-2015          | <a href="https://apf.francophonie.org/IMG/pdf/2013_10_vih_dakar_senegalstrategie.pdf">https://apf.francophonie.org/IMG/pdf/2013_10_vih_dakar_senegalstrategie.pdf</a>                                                                                                                                                                                                                                                                                                                                 |
|                       | Monitoring essential medicine prices, availability and affordability                                                  | 2008               | <a href="https://halweb.org/wp-content/uploads/2015/07/Sao-Tome-and-Principe-Report-Pricing-Surveys.pdf">https://halweb.org/wp-content/uploads/2015/07/Sao-Tome-and-Principe-Report-Pricing-Surveys.pdf</a>                                                                                                                                                                                                                                                                                           |
|                       | WHO country co-operation strategy                                                                                     | 2008-13            | <a href="https://www.who.int/publications/i/item/WHO-CCU-15-03-SaoTomeandPrincipe">https://www.who.int/publications/i/item/WHO-CCU-15-03-SaoTomeandPrincipe</a>                                                                                                                                                                                                                                                                                                                                       |
| Sao tome and Principe | Eliminating malaria in SAO TOMÉ AND PRÍNCIPE                                                                          | 2015               | Document shared                                                                                                                                                                                                                                                                                                                                                                                                                                                                                       |
|                       | EXPANDED PROGRAM ON IMMUNIZATION                                                                                      | 2016-2020          | Document shared                                                                                                                                                                                                                                                                                                                                                                                                                                                                                       |
|                       | Malaria Control Strategic Plan                                                                                        | 2016 - 2020        | <a href="https://www.afro.who.int/sites/default/files/2017-05/mcsp.pdf">https://www.afro.who.int/sites/default/files/2017-05/mcsp.pdf</a>                                                                                                                                                                                                                                                                                                                                                             |
|                       | national-leprosy-and-tb-strategic-plan-2016-2020-final-draft                                                          | 2016 - 2020        | <a href="https://portal.mohs.gov.sl/wp-content/uploads/2021/04/national-leprosy-and-tb-strategic-plan-2016-2020-final-draft.pdf">https://portal.mohs.gov.sl/wp-content/uploads/2021/04/national-leprosy-and-tb-strategic-plan-2016-2020-final-draft.pdf</a>                                                                                                                                                                                                                                           |
|                       | Sierra Leone National Strategic Plan on HIV 2016 - 2020                                                               | 2016 - 2020        | <a href="https://portal.mohs.gov.sl/wp-content/uploads/2021/04/sierra-leone-hiv-national-strategic-plan-2016-2020.pdf">https://portal.mohs.gov.sl/wp-content/uploads/2021/04/sierra-leone-hiv-national-strategic-plan-2016-2020.pdf</a>                                                                                                                                                                                                                                                               |
|                       | Sierra Leone Laboratory System - now & future                                                                         | 2016 - 2020        | Document shared                                                                                                                                                                                                                                                                                                                                                                                                                                                                                       |
|                       | Sierra Leone & Guinea Lab Diagnostic Training and Transition Plan                                                     | 2010               | <a href="https://www.aphl.org/aboutAPHL/publications/Documents/APHL_Sierra_Leone_Guinea_Report_proof6.pdf">https://www.aphl.org/aboutAPHL/publications/Documents/APHL_Sierra_Leone_Guinea_Report_proof6.pdf</a>                                                                                                                                                                                                                                                                                       |
|                       | Lab strengthening in public health emergencies: perspectives from Sierra Leone                                        | 2016               | <a href="http://diadev.eu/images/Lab-Strengthening-Working-Paper_DiaDev_2020_2020-10-07-123308.pdf">http://diadev.eu/images/Lab-Strengthening-Working-Paper_DiaDev_2020_2020-10-07-123308.pdf</a>                                                                                                                                                                                                                                                                                                     |
|                       | Sierra Leone National Reproductive, Maternal, Newborn, Child & Adolescent Health Strategy                             | 2020               | <a href="https://www.who.int/publications/sierra-leone-national-reproductive-maternal-newborn-child-and-adolescent-health-policy">https://www.who.int/publications/sierra-leone-national-reproductive-maternal-newborn-child-and-adolescent-health-policy</a>                                                                                                                                                                                                                                         |
|                       | Sierra Leone WHO Profile Diabetes                                                                                     | 2017-2021          | <a href="https://www.who.int/publications/m/item/diabetes-sie-country-profile-sierra-leone-2016">https://www.who.int/publications/m/item/diabetes-sie-country-profile-sierra-leone-2016</a>                                                                                                                                                                                                                                                                                                           |
|                       | Integrating Diabetes and HTN into SI Health System                                                                    | 2016               | Document shared                                                                                                                                                                                                                                                                                                                                                                                                                                                                                       |
|                       | SI Non-communicable Disease                                                                                           | 2020               | Document shared                                                                                                                                                                                                                                                                                                                                                                                                                                                                                       |
|                       | sierra-leone-basic-package                                                                                            | 2020               | <a href="https://mohs2017.files.wordpress.com/2017/06/gosi_2015_basic-package-of-essential-health-services-2015-2020.pdf">https://mohs2017.files.wordpress.com/2017/06/gosi_2015_basic-package-of-essential-health-services-2015-2020.pdf</a>                                                                                                                                                                                                                                                         |
|                       | Health Sector Strategic Plan                                                                                          | 2010               | <a href="http://www.health.gov.za/wp-content/uploads/2017/06/Health-Sector-Strategic-Plan-2010-2014.pdf">http://www.health.gov.za/wp-content/uploads/2017/06/Health-Sector-Strategic-Plan-2010-2014.pdf</a>                                                                                                                                                                                                                                                                                           |
|                       | Somalia National Strategic Plan for Malaria                                                                           | 2017-2021          | <a href="https://moh.gov.so/en/wp-content/uploads/2020/07/Somalia-National-Malaria-Strategic-Plan-2017-2020.pdf">https://moh.gov.so/en/wp-content/uploads/2020/07/Somalia-National-Malaria-Strategic-Plan-2017-2020.pdf</a>                                                                                                                                                                                                                                                                           |
|                       | Strategic Framework for the Somali for HIV                                                                            | 2011-2015          | Strategic Framework for the Somali for HIV                                                                                                                                                                                                                                                                                                                                                                                                                                                            |
|                       | Rep, Maternal, Neonatal, Child, Adolescent Health Strategy                                                            | 2020-2024          | <a href="https://www.emro.who.int/somalia/priority-areas/r/reproductive-maternal-neonatal-child-and-adolescent-health.html">https://www.emro.who.int/somalia/priority-areas/r/reproductive-maternal-neonatal-child-and-adolescent-health.html</a>                                                                                                                                                                                                                                                     |
|                       | TOR - Somalia GF TB Program EQA                                                                                       | 2020-2024          | Document shared                                                                                                                                                                                                                                                                                                                                                                                                                                                                                       |
|                       | depthhealthstrategicplanfinal2020-21to2024-25-1                                                                       | 2009-2013          | <a href="https://www.health.gov.za/wp-content/uploads/2020/11/depthhealthstrategicplanfinal2020-21to2024-25-1.pdf">https://www.health.gov.za/wp-content/uploads/2020/11/depthhealthstrategicplanfinal2020-21to2024-25-1.pdf</a>                                                                                                                                                                                                                                                                       |
|                       | national-cancer-strategic-framework-2017-2022-min                                                                     | 2020-2024          | <a href="https://www.health.gov.za/wp-content/uploads/2020/11/national-cancer-strategic-framework-2017-2022-min.pdf">https://www.health.gov.za/wp-content/uploads/2020/11/national-cancer-strategic-framework-2017-2022-min.pdf</a>                                                                                                                                                                                                                                                                   |
|                       | SouthAfrica_National-Health-Strategic-Plan_2015                                                                       | 2015               | <a href="https://www.childreandaids.org/SouthAfrica_National-Health-Strategic-Plan_2015">https://www.childreandaids.org/SouthAfrica_National-Health-Strategic-Plan_2015</a>                                                                                                                                                                                                                                                                                                                           |
|                       | South Africa's National Strategic Plan for HIV, TB and STIs_FullDocument_FINAL                                        | 2017-2022          | <a href="https://www.gov.za/sites/default/files/gcis_document/201705/nsp-hiv-tb-stia.pdf">https://www.gov.za/sites/default/files/gcis_document/201705/nsp-hiv-tb-stia.pdf</a>                                                                                                                                                                                                                                                                                                                         |
|                       | SouthAfrica_National-Health-Strategic-Plan_2015                                                                       | 2017-2022          | <a href="https://www.childreandaids.org/SouthAfrica_National-Health-Strategic-Plan_2015">https://www.childreandaids.org/SouthAfrica_National-Health-Strategic-Plan_2015</a>                                                                                                                                                                                                                                                                                                                           |
|                       | National Health Laboratory Services                                                                                   | 2015-2020          | Document shared                                                                                                                                                                                                                                                                                                                                                                                                                                                                                       |
|                       | Malaria Elimination Strategy Plan for South Africa                                                                    | 2019-2023          | <a href="https://www.nicd.ac.za/wp-content/uploads/2019/10/MALARIA-ELIMINATION-STRATEGIC-PLAN-FOR-SOUTH-AFRICA-2019-2023-MALARIA-EUMINATION-STRATEGIC-PLAN-2019-2023.pdf">https://www.nicd.ac.za/wp-content/uploads/2019/10/MALARIA-ELIMINATION-STRATEGIC-PLAN-FOR-SOUTH-AFRICA-2019-2023-MALARIA-EUMINATION-STRATEGIC-PLAN-2019-2023.pdf</a>                                                                                                                                                         |
|                       | South Africa's National Strategic Plan Reduce Maternal & Child Mortality                                              | 2020-2025          | <a href="http://www.kznhealth.gov.za/family/CARMMMA_south_africa_strategy">http://www.kznhealth.gov.za/family/CARMMMA_south_africa_strategy</a>                                                                                                                                                                                                                                                                                                                                                       |
|                       | South Africa WHO Profile Diabetes                                                                                     | 2016               | <a href="https://www.who.int/publications/m/item/diabetes-zaf-country-profile-south-africa-2016">https://www.who.int/publications/m/item/diabetes-zaf-country-profile-south-africa-2016</a>                                                                                                                                                                                                                                                                                                           |
|                       | Strategic Plan for the Prevention and Control of NCD                                                                  | 2016               | <a href="https://bhekissia.org/wp-content/uploads/2022/06/NCDS-NSP-SA-2022-2027-1.pdf">https://bhekissia.org/wp-content/uploads/2022/06/NCDS-NSP-SA-2022-2027-1.pdf</a>                                                                                                                                                                                                                                                                                                                               |
|                       | policy-framework-on-decentralised-management-of-mdr-tb-may-2019_compressed                                            | 2013-2017          | <a href="https://www.health.gov.za/wp-content/uploads/2020/11/policy-framework-on-decentralised-management-of-mdr-tb-may-2019_compressed.pdf">https://www.health.gov.za/wp-content/uploads/2020/11/policy-framework-on-decentralised-management-of-mdr-tb-may-2019_compressed.pdf</a>                                                                                                                                                                                                                 |
|                       | south_sudan_national_health_policy_2016_to_2025_2                                                                     | 2016-2017          | <a href="https://extranet.who.int/countryplanningcycles/sites/default/files/planning_cycle_repository/south_sudan/south_sudan_national_health_policy_2016_to_2025_2.pdf">https://extranet.who.int/countryplanningcycles/sites/default/files/planning_cycle_repository/south_sudan/south_sudan_national_health_policy_2016_to_2025_2.pdf</a>                                                                                                                                                           |
|                       | south-sudan-sbcs-hiv                                                                                                  | 2016-2026          | Document shared                                                                                                                                                                                                                                                                                                                                                                                                                                                                                       |
|                       | New guidelines for TB Control-South Sudan-V4- Final version 23-06-2016                                                | 2019               | <a href="http://www.arkangelo.org/AAA/AAA%20documents/2016%20documents/New%20guidelines%20for%20TB%20Control-South%20Sudan-V4-%20Final%20version%2023-06-2016.pdf">http://www.arkangelo.org/AAA/AAA%20documents/2016%20documents/New%20guidelines%20for%20TB%20Control-South%20Sudan-V4-%20Final%20version%2023-06-2016.pdf</a>                                                                                                                                                                       |
|                       | South Sudan Reproductive Health Strategic Plan 2013-16                                                                | 2018-2020          | <a href="https://healtheducationresources.unesco.org/library/documents/south-sudan-reproductive-health-strategic-plan-2013-16">https://healtheducationresources.unesco.org/library/documents/south-sudan-reproductive-health-strategic-plan-2013-16</a>                                                                                                                                                                                                                                               |
|                       | SSMI Vol 13 No 5 Special Malaria Issue_final                                                                          | 2013-2016          | <a href="http://www.southsudanmedicaljournal.org/assets/files/Journals/Vol_13_Iss_5_Dec_20/SSMI%20Vol%2013%20No%205%20Special%20Malaria%20Issue_final.pdf">http://www.southsudanmedicaljournal.org/assets/files/Journals/Vol_13_Iss_5_Dec_20/SSMI%20Vol%2013%20No%205%20Special%20Malaria%20Issue_final.pdf</a>                                                                                                                                                                                       |
|                       | hiv_plan_sudan                                                                                                        | 2020               | <a href="https://extranet.who.int/countryplanningcycles/sites/default/files/country_docs/Sudan/hiv_plan_sudan.pdf">https://extranet.who.int/countryplanningcycles/sites/default/files/country_docs/Sudan/hiv_plan_sudan.pdf</a>                                                                                                                                                                                                                                                                       |
|                       | sudan_national_health_sector_strategic_plan_nhsp_2012-2016                                                            | 2004-2009          | Document shared                                                                                                                                                                                                                                                                                                                                                                                                                                                                                       |
|                       | sudan_national_health_policy_2007_en                                                                                  | 2012-2016          | <a href="http://sho.gov.sd/controller/dwn_hib_files.php?id=1396">http://sho.gov.sd/controller/dwn_hib_files.php?id=1396</a>                                                                                                                                                                                                                                                                                                                                                                           |
|                       | Sudan-Malaria-Treatment-Protocol_2017                                                                                 | 2007               | <a href="https://reliefweb.int/report/sudan/sudan-malaria-diagnosis-and-treatment-protocol-2017">https://reliefweb.int/report/sudan/sudan-malaria-diagnosis-and-treatment-protocol-2017</a>                                                                                                                                                                                                                                                                                                           |
|                       | Sudan-National-TB-management-Guideline-March-2019-1                                                                   | 2017               | <a href="https://www.humanitarianresponse.info/sites/www.humanitarianresponse.info/files/2019/07/Sudan-National-TB-management-Guideline-March-2019-1.pdf">https://www.humanitarianresponse.info/sites/www.humanitarianresponse.info/files/2019/07/Sudan-National-TB-management-Guideline-March-2019-1.pdf</a>                                                                                                                                                                                         |
|                       | 8.The_Nat_Health_Policy_2017_6th_24_October_2017                                                                      | 2017               | <a href="https://www.eahealth.org/policy-publications/tanzania-national-health-policy-2017">https://www.eahealth.org/policy-publications/tanzania-national-health-policy-2017</a>                                                                                                                                                                                                                                                                                                                     |
|                       | national_strategic_plan_for_TB_2015_2020                                                                              | 2017               | <a href="https://www.tbdiagn.org/resources/publications/national-strategic-plan-v-for-tuberculosis-and-leprosy-programme-2015-2020">https://www.tbdiagn.org/resources/publications/national-strategic-plan-v-for-tuberculosis-and-leprosy-programme-2015-2020</a>                                                                                                                                                                                                                                     |
|                       | HEALTH SECTOR HIV AND AIDS STRATEGIC PLAN 2017 - 2022                                                                 | 2017-2022          | <a href="http://library.tacadis.gov.tz/bitstream/handle/123456789/128/HEALTH%20SECTOR%20HIV%20AND%20AIDS%20STRATEGIC%20PLAN%202018%20-%202022.pdf?sequence=1&amp;isAllowed=y#r=text=The%20HS%20is%20a%20sector.Elderly%20and%20Children%20(MOHCDEG).">http://library.tacadis.gov.tz/bitstream/handle/123456789/128/HEALTH%20SECTOR%20HIV%20AND%20AIDS%20STRATEGIC%20PLAN%202018%20-%202022.pdf?sequence=1&amp;isAllowed=y#r=text=The%20HS%20is%20a%20sector.Elderly%20and%20Children%20(MOHCDEG).</a> |
|                       | TANZANIA_Malaria-Strategic-Plan-2014-2020                                                                             | 2014 - 2020        | <a href="https://www.out.ac.tz/wp-content/uploads/2019/10/Malaria-Strategic-Plan-2015-2020-1.pdf">https://www.out.ac.tz/wp-content/uploads/2019/10/Malaria-Strategic-Plan-2015-2020-1.pdf</a>                                                                                                                                                                                                                                                                                                         |
|                       | NCD Strategic Plan 2016 - 2020                                                                                        | 2016-2020          | <a href="https://extranet.who.int/nutrition/gina/sites/default/filesstore/ITZA-2016-2020-NCD%20strategic%20plan.pdf">https://extranet.who.int/nutrition/gina/sites/default/filesstore/ITZA-2016-2020-NCD%20strategic%20plan.pdf</a>                                                                                                                                                                                                                                                                   |
|                       | 701320PROPOP110y000ProcurementPlan                                                                                    | 2015-2020          | <a href="https://documents1.worldbank.org/curated/en/209671468009941791/pdf/701320PROPOP110y000ProcurementPlan.pdf">https://documents1.worldbank.org/curated/en/209671468009941791/pdf/701320PROPOP110y000ProcurementPlan.pdf</a>                                                                                                                                                                                                                                                                     |
|                       | Health Sector Strategic Plan                                                                                          | 2015 - 2020        | <a href="https://mitu.or.tz/wp-content/uploads/2021/07/Tanzania-Health-Sector-Strategic-Plan-V-17-06-2021-Final-signed.pdf">https://mitu.or.tz/wp-content/uploads/2021/07/Tanzania-Health-Sector-Strategic-Plan-V-17-06-2021-Final-signed.pdf</a>                                                                                                                                                                                                                                                     |
|                       | TGO-111030                                                                                                            | 2015-2020          | Document shared                                                                                                                                                                                                                                                                                                                                                                                                                                                                                       |
|                       | PLAN NATIONAL DE DEVELOPPEMENT SANITAIRE 2017-2022                                                                    | 2021-2025          | <a href="https://www.afro.who.int/fr/publications/programma-national-de-developpement-sanitaire-du-togo-2017-2022">https://www.afro.who.int/fr/publications/programma-national-de-developpement-sanitaire-du-togo-2017-2022</a>                                                                                                                                                                                                                                                                       |
|                       | howard-morris_standardization-and-harmonization-in-laboratory-medicine                                                | 2017-2022          | Document shared                                                                                                                                                                                                                                                                                                                                                                                                                                                                                       |
|                       | Test menu_Final-Draft_26Oct2017_Signed copy-2                                                                         | 2019               | Document shared                                                                                                                                                                                                                                                                                                                                                                                                                                                                                       |
|                       | NATIONAL STRATEGIC PLAN FOR TB AND LEPROSY_Nov_24_2020_WEB-1                                                          | 2017-2020          | <a href="https://www.health.go.ug/cause/national-strategic-plan-for-tuberculosis-and-leprosy-control-2020-21-2024-25/">https://www.health.go.ug/cause/national-strategic-plan-for-tuberculosis-and-leprosy-control-2020-21-2024-25/</a>                                                                                                                                                                                                                                                               |
|                       | The-Uganda-Malaria-Reduction-Strategic-Plan-2014-2020                                                                 | 2021-2025          | <a href="http://library.health.go.ug/sites/default/files/resources/The%20Uganda%20Malaria%20Reduction%20Strategic%20Plan%202014-2020.pdf">http://library.health.go.ug/sites/default/files/resources/The%20Uganda%20Malaria%20Reduction%20Strategic%20Plan%202014-2020.pdf</a>                                                                                                                                                                                                                         |
|                       | Uganda_National-HIV-and-AIDS-Strategic-Plan_2015                                                                      | 2014-2020          | <a href="https://www.childreandaids.org/uganda-national-hiv-and-aids-strategic-plan-2015">https://www.childreandaids.org/uganda-national-hiv-and-aids-strategic-plan-2015</a>                                                                                                                                                                                                                                                                                                                         |
|                       | UGANDA NATIONAL HEALTH LABORATORY SERVICES POLICY                                                                     | 2016-2020          | <a href="https://www.cphl.go.ug/node/142#text=The%20policy%20sets%20direction%20in%20supplies%20of%20human%20resources%20of%20quality%20management">https://www.cphl.go.ug/node/142#text=The%20policy%20sets%20direction%20in%20supplies%20of%20human%20resources%20of%20quality%20management</a>                                                                                                                                                                                                     |
|                       | Zambia National Health Strategy                                                                                       | 2017-2021          | <a href="https://www.moh.gov.zm/?wpfb_d=182#text=This%20strategic%20plan%20focuses%20on%20possible%20leaving%20no%20one%20behind">https://www.moh.gov.zm/?wpfb_d=182#text=This%20strategic%20plan%20focuses%20on%20possible%20leaving%20no%20one%20behind</a>                                                                                                                                                                                                                                         |
|                       | UNFPA-RMNCAN-Communication-and-Advocacy-Strategy-2018-2021                                                            | 2017-2021          | <a href="https://www.unfpa.org/sites/default/files/pub-pdf/UNFPA%20Strategy%20for%20Family%20Planning%202022-2030.pdf">https://www.unfpa.org/sites/default/files/pub-pdf/UNFPA%20Strategy%20for%20Family%20Planning%202022-2030.pdf</a>                                                                                                                                                                                                                                                               |
|                       | 4 Tuberculosis Manual for Zambia_Final                                                                                | 2018-2021          | <a href="https://www.afro.who.int/sites/default/files/2019-06/4%20%20Tuberculosis%20Manual%20for%20Zambia_Final.pdf">https://www.afro.who.int/sites/default/files/2019-06/4%20%20Tuberculosis%20Manual%20for%20Zambia_Final.pdf</a>                                                                                                                                                                                                                                                                   |
|                       | zambia_tuberculosis_programme-stop_tb_strategic_plan_2008-2012                                                        | 2008-2021          | <a href="https://dolataschan.com/4/5737255">https://dolataschan.com/4/5737255</a>                                                                                                                                                                                                                                                                                                                                                                                                                     |
|                       | zmb_str_national_aids_strategic_framework_2017-2021_30may2017                                                         | 2017-2021          | <a href="https://www.unicef.org/zambia/media/1031/file/Zambia-national-AIDS-strategic-framework-2017-2021.pdf">https://www.unicef.org/zambia/media/1031/file/Zambia-national-AIDS-strategic-framework-2017-2021.pdf</a>                                                                                                                                                                                                                                                                               |

|          |                                                                   |           |                                                                                                                                                                                                                                                                                                                                                                                 |
|----------|-------------------------------------------------------------------|-----------|---------------------------------------------------------------------------------------------------------------------------------------------------------------------------------------------------------------------------------------------------------------------------------------------------------------------------------------------------------------------------------|
|          | Zambia Strategic Plan NCD Risk Factors                            | 2013-2015 | <a href="https://www.iccp-portal.org/system/files/plans/ZMB_B3_NCDs%20Strategic%20plan.pdf">https://www.iccp-portal.org/system/files/plans/ZMB_B3_NCDs%20Strategic%20plan.pdf</a>                                                                                                                                                                                               |
|          | Zambio Biomed Lab Strategic Plan                                  | 2013-2016 | <a href="https://www.moh.gov.zm/?wpfb_dl=82">https://www.moh.gov.zm/?wpfb_dl=82</a>                                                                                                                                                                                                                                                                                             |
|          | National Malaria Elimination Strategic Plan 2017-Final_PRINT      | 2017-2022 | <a href="https://static1.squarespace.com/static/584002f017bffc99fe21889/t/5b28d7f1575d1ff0942dbce1/1529403401067/National+Malaria+Elimination+Strategic+Plan+2017-Final_PRINT.pdf">https://static1.squarespace.com/static/584002f017bffc99fe21889/t/5b28d7f1575d1ff0942dbce1/1529403401067/National+Malaria+Elimination+Strategic+Plan+2017-Final_PRINT.pdf</a>                 |
|          | Harmonization and Standardisation Document_Zimbabwe 2015          | 2015      | Document shared                                                                                                                                                                                                                                                                                                                                                                 |
| Zimbabwe | Zimbabwe Health Sector HIV and STI Strategy                       | 2021-2025 | <a href="http://www.mohcc.gov.zw/index.php?option=com_phocadownload&amp;view=category&amp;download=672:comprehensive-national-strategy-final-digital-pdf&amp;id=10:reports&amp;Itemid=720">http://www.mohcc.gov.zw/index.php?option=com_phocadownload&amp;view=category&amp;download=672:comprehensive-national-strategy-final-digital-pdf&amp;id=10:reports&amp;Itemid=720</a> |
|          | National Health Laboratory Strategic Plan                         | 2017-2021 | <a href="https://www.unicef.org/zimbabwe/media/411/file/National%20Health%20Laboratory%20Strategic%20Plan.pdf">https://www.unicef.org/zimbabwe/media/411/file/National%20Health%20Laboratory%20Strategic%20Plan.pdf</a>                                                                                                                                                         |
|          | The National Malaria Control Programme Strategy                   | 2008-2013 | <a href="https://d1u4kg1s9ptc4.cloudfront.net/uploads/2022/01/FY_2022-Zimbabwe-MOP.pdf">https://d1u4kg1s9ptc4.cloudfront.net/uploads/2022/01/FY_2022-Zimbabwe-MOP.pdf</a>                                                                                                                                                                                                       |
|          | Zimbabwe National Maternal and Neonatal Health Road Map 2007-2015 | 2007-2015 | <a href="https://extranet.who.int/countryplanningcycles/sites/default/files/planning_cycle_repository/zimbabwe/zimbabwe_mnh_roadmap_2007-2015_0.pdf">https://extranet.who.int/countryplanningcycles/sites/default/files/planning_cycle_repository/zimbabwe/zimbabwe_mnh_roadmap_2007-2015_0.pdf</a>                                                                             |
|          | Final2 draft NHL Strategic Plan 2022-2026                         | 2022-2026 | <a href="https://www.northmankato.com/sites/default/files/documents/2021%20Strategic%20Plan%20Attachments_0.pdf">https://www.northmankato.com/sites/default/files/documents/2021%20Strategic%20Plan%20Attachments_0.pdf</a>                                                                                                                                                     |
|          | National Tuberculosis Program Strategic Plan                      | 2017-2020 | <a href="https://depts.washington.edu/edgh/zw/hit/web/project-resources/TB-NSP.pdf">https://depts.washington.edu/edgh/zw/hit/web/project-resources/TB-NSP.pdf</a>                                                                                                                                                                                                               |
