# Supplementary material for: Contexts for developing of national essential diagnostics list. Lessons from a mixed-methods study of existing documents, stakeholders and decision making on tier-specific essential in-vitro diagnostics in African countries
Source: PubMed Central journal article supplement (PMC10194858; doi:10.1371/journal.pgph.0001893), 2023-05-18
Supplement: pgph.0001893.s003.pdf [file pgph.0001893.s003.pdf]

| Name of country                  | Name of Document                                                            | URL                                                                                                                                                                                                                                                                                                                                                                                                                                                                                                       |
|----------------------------------|-----------------------------------------------------------------------------|-----------------------------------------------------------------------------------------------------------------------------------------------------------------------------------------------------------------------------------------------------------------------------------------------------------------------------------------------------------------------------------------------------------------------------------------------------------------------------------------------------------|
| eSwatini                         | Eswatini HLS Strategic Plan 2021-2023-Cleaned-16Feb2022_Final Signed        | <a href="https://www.ers.org.sz/documents/1616518535.pdf">https://www.ers.org.sz/documents/1616518535.pdf</a>                                                                                                                                                                                                                                                                                                                                                                                             |
| Ghana                            | GHANA LAB POLICY final (310513) Accepted - June 23, 2015                    | <a href="https://www.afro.who.int/sites/default/files/2017-05/annual-report-2015--wco-ghana.pdf">https://www.afro.who.int/sites/default/files/2017-05/annual-report-2015--wco-ghana.pdf</a>                                                                                                                                                                                                                                                                                                               |
| Ghana                            | GHANA NHLSP Draft (2) 14-3-12 -final draft                                  | Document shared                                                                                                                                                                                                                                                                                                                                                                                                                                                                                           |
| Kenya                            | Kenya_SP NPHL March_Final_March 27th 2017                                   | Document shared                                                                                                                                                                                                                                                                                                                                                                                                                                                                                           |
| Malawi                           | Malawi_National Laboratory Policy Approved Version 13-03-2018.              | Document shared                                                                                                                                                                                                                                                                                                                                                                                                                                                                                           |
| Nigeria                          | Nigeria_Approved Nigeria National Medical Laboratory Services Policy_FP     | Document shared                                                                                                                                                                                                                                                                                                                                                                                                                                                                                           |
| Nigeria                          | Nigeria_Reviewed version of NMLSP from group of lab experts November 2021 X | Document shared                                                                                                                                                                                                                                                                                                                                                                                                                                                                                           |
| Sierra Leone                     | Sierra Leone_final NMLSTP                                                   | Document shared                                                                                                                                                                                                                                                                                                                                                                                                                                                                                           |
| Tanzania                         | Tanzania_NHLSP II_Final_6-5-2016                                            | Document shared                                                                                                                                                                                                                                                                                                                                                                                                                                                                                           |
| Uganda                           | UGANDA NATIONAL HEALTH LABORATORY SERVICES POLICY II 2016                   | <a href="https://www.cphi.go.ug/sites/default/files/2019-06/UG%20NHLSP%20Policy%20%20LTC%20Final%20draft%20-%20Thomas-Pizaro-Gaspard%20signed23Mar2018.pdf">https://www.cphi.go.ug/sites/default/files/2019-06/UG%20NHLSP%20Policy%20%20LTC%20Final%20draft%20-%20Thomas-Pizaro-Gaspard%20signed23Mar2018.pdf</a>                                                                                                                                                                                         |
| Cameroon                         | Cameroon - Plan Stratégic National du Developmt labo 2018-2020_Eng          | <a href="http://onsp.minsante.cm/en/publication/307/cameroon-national-laboratory-policy">http://onsp.minsante.cm/en/publication/307/cameroon-national-laboratory-policy</a>                                                                                                                                                                                                                                                                                                                               |
| Niger                            | PLAN_STRATEGIQUE_RECERCHE_EN_SANTE_2013_2020adoptuin.pdf                    | <a href="https://healthresearchwebafrica.org.za/files/PLAN_STRATEGIQUE_RECERCHE_EN_SANTE_2013_2020adoptuin.pdf">https://healthresearchwebafrica.org.za/files/PLAN_STRATEGIQUE_RECERCHE_EN_SANTE_2013_2020adoptuin.pdf</a>                                                                                                                                                                                                                                                                                 |
| Niger                            | PNS_VERSION FINALE NIGER                                                    | <a href="https://www.dphmt-msp.ne/sites/default/files/textes/PNS_VERSION%20FINALE%20NIGER.pdf">https://www.dphmt-msp.ne/sites/default/files/textes/PNS_VERSION%20FINALE%20NIGER.pdf</a>                                                                                                                                                                                                                                                                                                                   |
| Niger                            | PSA Niger 2019-2023 VF                                                      | Document shared                                                                                                                                                                                                                                                                                                                                                                                                                                                                                           |
| Madagascar                       | MDG_B3_B DOC PSNLMINT- PH ce 02072018                                       | Document shared                                                                                                                                                                                                                                                                                                                                                                                                                                                                                           |
| Madagascar                       | Plan Stratégique de Renforcement du Système d'Information Sanitaire         | <a href="https://www.measureevaluation.org/resources/publications/sr-17-146/at_download/document#:text=Le%20Plan%20de%20D%C3%A9veloppement%20du%20interventions%20futures%20de%20d%C3%A9veloppement%20sanitaire">https://www.measureevaluation.org/resources/publications/sr-17-146/at_download/document#:text=Le%20Plan%20de%20D%C3%A9veloppement%20du%20interventions%20futures%20de%20d%C3%A9veloppement%20sanitaire</a>                                                                               |
| Madagascar                       | Plan strategique national de renforcement de la sante communautaire         | <a href="http://www.healthpolicyplus.com/ns/pubs/17365-17659_PSNRSC.pdf">http://www.healthpolicyplus.com/ns/pubs/17365-17659_PSNRSC.pdf</a>                                                                                                                                                                                                                                                                                                                                                               |
| Madagascar                       | Plan-de-développement-du-secteur-santé-2020-2024_Eng                        | <a href="https://scorecard.prb.org/wp-content/uploads/2022/03/Plan-de-de%CC%81veloppement-du-secteur-santé%CC%81-2020-2024.pdf">https://scorecard.prb.org/wp-content/uploads/2022/03/Plan-de-de%CC%81veloppement-du-secteur-santé%CC%81-2020-2024.pdf</a>                                                                                                                                                                                                                                                 |
| Madagascar                       | Plan-Stratégie-SISAL-2016-2020_Eng                                          | <a href="http://www.platforme-elsa.org/wp-content/uploads/2017/03/Plan-Strate%CC%81gique-SISAL-2016-2020.pdf">http://www.platforme-elsa.org/wp-content/uploads/2017/03/Plan-Strate%CC%81gique-SISAL-2016-2020.pdf</a>                                                                                                                                                                                                                                                                                     |
| Cape Verde                       | IV Plano Estratégico Nacional VIH-SIDA2020                                  | <a href="https://ccsida.cv/wp-content/uploads/2021/10/IV-Plano-Estrategico-Nacional-VIH-SIDA2020.cleaned.pdf">https://ccsida.cv/wp-content/uploads/2021/10/IV-Plano-Estrategico-Nacional-VIH-SIDA2020.cleaned.pdf</a>                                                                                                                                                                                                                                                                                     |
| Cape Verde                       | PEDRHS Ministerio Saude 2016                                                | Document shared                                                                                                                                                                                                                                                                                                                                                                                                                                                                                           |
| Cape Verde                       | PNDS 2017-2021 -VOL I Definitivo                                            | Document shared                                                                                                                                                                                                                                                                                                                                                                                                                                                                                           |
| Cape Verde                       | PNDS 2017-2021 -VOL I Definitivo_Eng                                        | Document shared                                                                                                                                                                                                                                                                                                                                                                                                                                                                                           |
| Guinea-Bissau                    | PLAN STRATEGIQUE CHOLERA GUINEE BISSAU_VF                                   | <a href="https://www.platforme-mecholera.info/index.php/bonus-page-2/national-strategies-plans/guinea-bissau/152-wca/strategic-framework/library-of-national-plans/445-plan-strategique-de-prevention-et-de-riposte-contre-le-cholera-en-guinee-bissau">https://www.platforme-mecholera.info/index.php/bonus-page-2/national-strategies-plans/guinea-bissau/152-wca/strategic-framework/library-of-national-plans/445-plan-strategique-de-prevention-et-de-riposte-contre-le-cholera-en-guinee-bissau</a> |
| Guinea-Bissau                    | Plano Nacional do Desenvolvimento Sanitário                                 | <a href="https://extranet.who.int/mindbank/item/3460">https://extranet.who.int/mindbank/item/3460</a>                                                                                                                                                                                                                                                                                                                                                                                                     |
| Guinea-Bissau                    | plano_nacional_de_desenvolvimento_sanit_rio_1997-2001                       | <a href="https://extranet.who.int/mindbank/download_file/3649/7fb7eef5d1f630b2968024b372fd64313680f74">https://extranet.who.int/mindbank/download_file/3649/7fb7eef5d1f630b2968024b372fd64313680f74</a>                                                                                                                                                                                                                                                                                                   |
| Sao Tome and Principe            | PNS1_validacao                                                              | Document shared                                                                                                                                                                                                                                                                                                                                                                                                                                                                                           |
| Seychelles                       | National-Health-Strategic-Plan-2022-2026-Full-Version                       | <a href="http://www.health.gov.sc/wp-content/uploads/National-Health-Strategic-Plan-2022-2026-Full-Version.pdf">http://www.health.gov.sc/wp-content/uploads/National-Health-Strategic-Plan-2022-2026-Full-Version.pdf</a>                                                                                                                                                                                                                                                                                 |
| Equatorial Guinea                | National health development plan                                            | <a href="https://www.guineasalud.org/archivos/Protocolos/Plan.pdf">https://www.guineasalud.org/archivos/Protocolos/Plan.pdf</a>                                                                                                                                                                                                                                                                                                                                                                           |
| Democratic Republic of the Congo | Politique Nationale sur l'Achat Stratégique des                             | Document shared                                                                                                                                                                                                                                                                                                                                                                                                                                                                                           |
| Democratic Republic of the Congo | RDC-Plan-National-de-Developpement-Sanitaire-2016-2020                      | <a href="https://www.prb.org/wp-content/uploads/2020/06/RDC-Plan-National-de-Developpement-Sanitaire-2016-2020.pdf">https://www.prb.org/wp-content/uploads/2020/06/RDC-Plan-National-de-Developpement-Sanitaire-2016-2020.pdf</a>                                                                                                                                                                                                                                                                         |
| Benin                            | VF_PNS_19_01_2020_VF Politique Nationale De Sante 2018-2030                 | <a href="https://files.who.int/jahobckpcontainer/production/files/VF_PNS_19_01_2020_VF.pdf">https://files.who.int/jahobckpcontainer/production/files/VF_PNS_19_01_2020_VF.pdf</a>                                                                                                                                                                                                                                                                                                                         |
| Rwanda                           | PNADF435 National Medical Laboratory Policy                                 | <a href="https://pdf.usaid.gov/pdf_docs/PNADF435.pdf">https://pdf.usaid.gov/pdf_docs/PNADF435.pdf</a>                                                                                                                                                                                                                                                                                                                                                                                                     |
| Ethiopia                         | Ethiopia Lab Master Plan_2nd Edition                                        | <a href="https://www.epi.gov.et/images/downloads/Ethiopia%20Lab%20Master%20Plan_2nd%20Edition.pdf">https://www.epi.gov.et/images/downloads/Ethiopia%20Lab%20Master%20Plan_2nd%20Edition.pdf</a>                                                                                                                                                                                                                                                                                                           |
