# Supplementary material for: Contexts for developing of national essential diagnostics list. Lessons from a mixed-methods study of existing documents, stakeholders and decision making on tier-specific essential in-vitro diagnostics in African countries
Source: PubMed Central journal article supplement (PMC10194858; doi:10.1371/journal.pgph.0001893), 2023-05-18
Supplement: pgph.0001893.s004.pdf [file pgph.0001893.s004.pdf]

| number if tests taken up<br>in country strategy | year of WHO<br>approval |
|-------------------------------------------------|-------------------------|
| 25                                              | 1999                    |
| 24                                              | 1999                    |
| 15                                              | 1999                    |
| 16                                              | 1999                    |
| 24                                              | 1999                    |
| 20                                              | 1999                    |
| 22                                              | 2009                    |
| 12                                              | 2009                    |
| 16                                              | 2009                    |
| 2                                               | 2017                    |
| 23                                              | 2008                    |
| 22                                              | 2008                    |
| 13                                              | 2008                    |
| 3                                               | 2008                    |
| 12                                              | 2008                    |
| 12                                              | 2008                    |
| 12                                              | 2008                    |
| 3                                               | 2015                    |
| 2                                               | 2015                    |
| 22                                              | 2006                    |
| 25                                              | 2006                    |
| 12                                              | 2006                    |
| 9                                               | 2013                    |
| 7                                               | 2013                    |
| 2                                               | 2017                    |
| 13                                              | 2003                    |
| 12                                              | 2003                    |
| 20                                              | 2013                    |
| 12                                              | 2013                    |
| 26                                              | 1989                    |
