# Supplementary material for: Contexts for developing of national essential diagnostics list. Lessons from a mixed-methods study of existing documents, stakeholders and decision making on tier-specific essential in-vitro diagnostics in African countries
Source: PubMed Central journal article supplement (PMC10194858; doi:10.1371/journal.pgph.0001893), 2023-05-18

S7 Figure. Flow chart sampling of documents

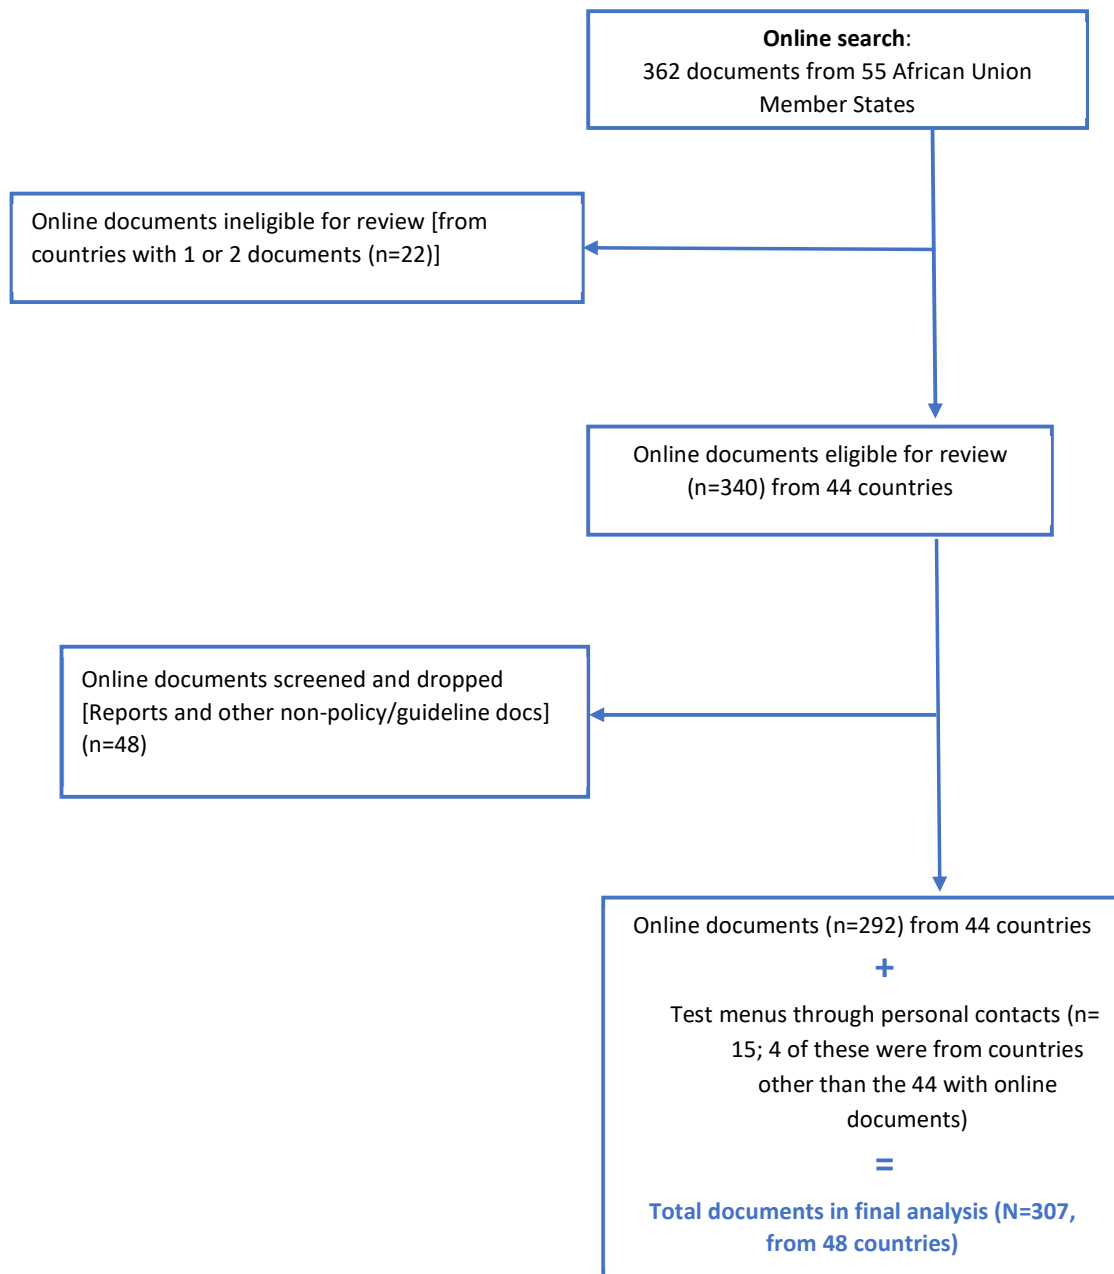

Supplement: pgph.0001893.s007.pdf [file pgph.0001893.s007.pdf]
